# Supplementary material for: Development of AIEE active fluorescent and colorimetric probe for the solid, solution, and vapor phase detection of cyanide: smartphone and food applications
Source: Royal Society of Chemistry journal article supplement (doi:10.1039/d2an00937d), 2022-01-01

## Supporting Information

### Development of AIEE Active Fluorescent and Colorimetric Probe for Solid, Solution, and Vapor Phase Detection of Cyanide: Smartphone and Food Applications

Shumaila Majeed<sup>a</sup>, Muhammad Tahir Waseem<sup>a</sup>, Gul Shahzada Khan<sup>b</sup>, Hafiz Muhammad Junaid<sup>a</sup>, Muhammad Imran<sup>c</sup>, Shamyala Nawazish<sup>d</sup>, Tausif Ahmad Khan<sup>a</sup>, Tariq Mahmood<sup>a</sup>,  
Sohail Anjum Shahzad<sup>a,\*</sup>

<sup>a</sup> Department of Chemistry, COMSATS University Islamabad, Abbottabad Campus, University Road, Abbottabad 22060, Pakistan

<sup>b</sup> Department of Chemistry, College of Science, University of Bahrain, Sakhir 32038, Bahrain

<sup>c</sup> Department of Chemistry, Faculty of Science, King Khalid University, P.O. Box 9004, Abha 61413, Saudi Arabia

<sup>d</sup> Department of Environmental Sciences, COMSATS University Islamabad, Abbottabad Campus, Abbottabad 22060, Pakistan

\* **Corresponding Author:** Department of Chemistry, COMSATS University Islamabad, Abbottabad Campus, University Road, Abbottabad 22060, Pakistan (S.A. Shahzad). E-mail address: [sashahzad@cuiatd.edu.pk](mailto:sashahzad@cuiatd.edu.pk) (S.A. Shahzad).

### TABLE OF CONTENTS

|                                                                                                                                                               |    |
|---------------------------------------------------------------------------------------------------------------------------------------------------------------|----|
| <b>SI-1.</b> Instruments and reagents-----                                                                                                                    | S2 |
| <b>Fig. S1.</b> The fluorescence spectral changes of probe <b>2</b> at various DMF/H <sub>2</sub> O ratios and plausible AIEE mechanism-----                  | S3 |
| <b>Fig. S2.</b> Theoretical representation of the benzenoid and quinonoid form of probe <b>2</b> accomplished through Gaussian 09 package at B3LYP/6-31G----- | S3 |
| <b>Fig. S3.</b> The fluorescence spectral changes of probe <b>2</b> at various DMF/ethylene glycol ratios----                                                 | S4 |
| <b>Fig. S4.</b> The fluorescence spectral changes of probe <b>2</b> at its various concentrations-----                                                        | S4 |
| <b>Fig. S5.</b> The UV-vis spectral change of probe <b>2</b> in the presence of different anions-----                                                         | S5 |
| <b>Fig. S6.</b> The fluorescence spectral change of probe <b>2</b> in the presence of different anions-----                                                   | S5 |

|                                                                                                                                                                 |     |
|-----------------------------------------------------------------------------------------------------------------------------------------------------------------|-----|
| <b>Fig. S7.</b> The fluorescence change of probe <b>2</b> containing CN <sup>-</sup> ions in the presence of interferences-----                                 | S6  |
| <b>Table S1.</b> The comparison of LOD for CN <sup>-</sup> and other features of probe <b>2</b> with already reported CN <sup>-</sup> probes-----               | S6  |
| <b>Fig. S8.</b> The Benesi–Hildebrand plot of probe <b>2</b> between fluorescence response vs increasing concentrations of CN <sup>-</sup> -----                | S7  |
| <b>Fig. S9.</b> The switchable fluorescence and colorimetric response of probe <b>2</b> -----                                                                   | S8  |
| <b>Fig. S10.</b> The putative sensing mechanism and <sup>1</sup> H NMR titration of probe <b>2</b> upon addition of increasing amounts of CN <sup>-</sup> ----- | S9  |
| <b>Fig. S11.</b> Frontier molecular orbital (FMO) plots of probe <b>2</b> and its probe– CN <sup>-</sup> complex-----                                           | S10 |
| <b>Fig. S12.</b> Effect of pH on the enhanced fluorescence emission response of probe <b>2</b> towards CN <sup>-</sup> -----                                    | S10 |
| <b>Fig. S13.</b> Photostability analysis of probe <b>2</b> and <b>2</b> –CN <sup>-</sup> complex-----                                                           | S10 |
| <b>Fig. S14.</b> The fluorescence spectra changes of probe <b>2</b> towards endogenous cyanide in food samples-----                                             | S11 |
| <b>Fig. S15.</b> The fluorescence spectra changes of probe <b>2</b> towards CN <sup>-</sup> spiked industrial wastewater-----                                   | S12 |
| <b>SI-1.</b> NMR spectra of synthesized compounds-----                                                                                                          | S13 |

## SI-1. Instruments and reagents

Proton nuclear magnetic resonance (<sup>1</sup>H NMR) spectra of compounds **1** and **2** were recorded at Bruker Avance 400 and 500 MHz while <sup>13</sup>C NMR spectra were carried out at Bruker Avance 100 and 125 MHz. Photophysical properties and sensing studies of compound **2** were scanned through fluorescence spectroscopy (FluoroMax-Plus-P-C, Horiba Jobin Yvon Technology, USA). UV-Vis spectrophotometer (SPECORD 200 PLUS-223E2003C, Analytik Jena, Germany) was used to record absorption spectra. Used reagents and chemicals were acquired from Daejung Chemicals & Metals (Korea), Alfa Aesar (UK), and Sigma Aldrich (USA). The chemicals enlist 9H-fluorenone, aniline, 9,9-Bis(4-aminophenyl)fluorene, methanesulfonic acid, ethyl acetate, *n*-hexane, DMSO-*d*<sub>6</sub>, salicylaldehyde, methanol, DMF, acetonitrile, THF, DCM, CHCl<sub>3</sub>, DMSO, CN<sup>-</sup>, I<sup>-</sup>, NO<sub>3</sub><sup>-</sup>, Cl<sup>-</sup>, F<sup>-</sup>, N<sub>3</sub><sup>-</sup>, Br<sup>-</sup>, H<sub>2</sub>PO<sub>4</sub><sup>-</sup>, ClO<sub>4</sub><sup>-</sup>, CH<sub>3</sub>COO<sup>-</sup>, and NO<sub>2</sub><sup>-</sup>.

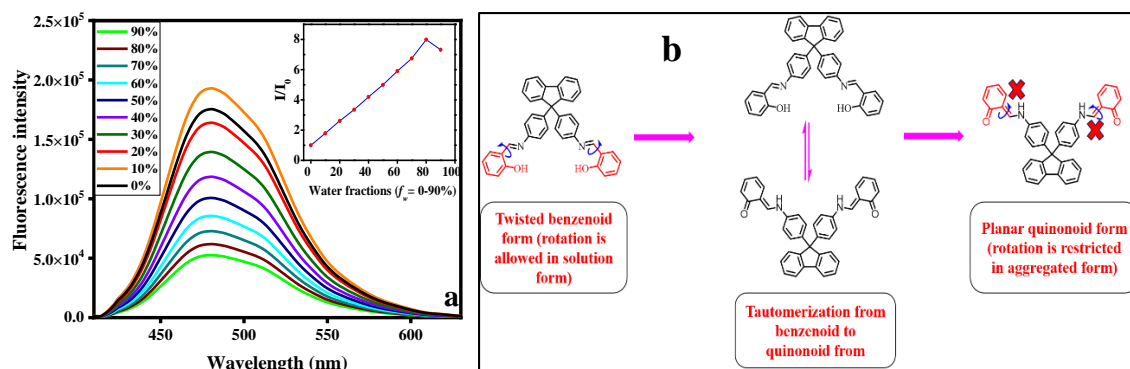

**Fig. S1.** The fluorescence spectral changes of probe **2** (10  $\mu$ M) at various DMF/H<sub>2</sub>O ratios (a) and plausible AIEE mechanism (b). Inset shows the general representation of AIEE pattern.

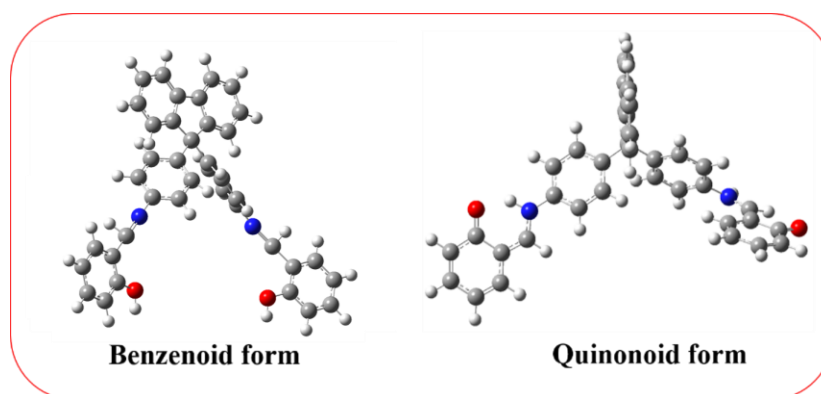

**Fig. S2.** Theoretical representation of the benzenoid and quinonoid form of probe **2** accomplished through Gaussian 09 package at B3LYP/6-31G (d).

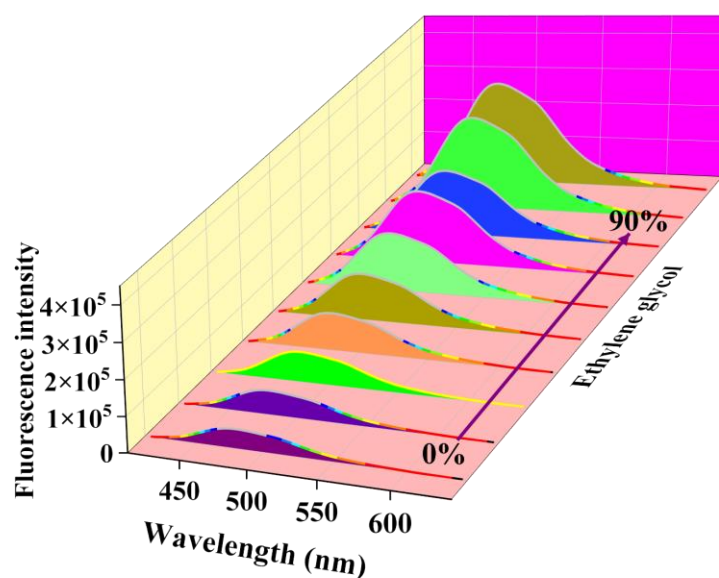

**Fig. S3.** The fluorescence spectral changes of probe **2** (10  $\mu\text{M}$ ) at various DMF/ethylene glycol ratios.

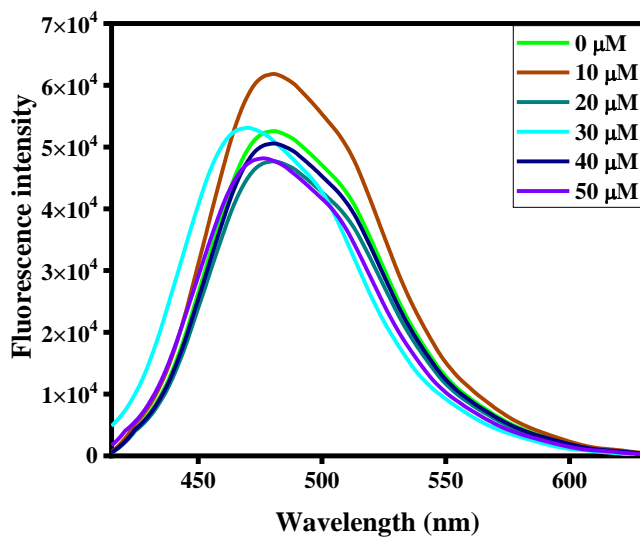

**Fig. S4.** The fluorescence spectral changes of probe **2** at its various concentrations (0–50  $\mu\text{M}$ ).

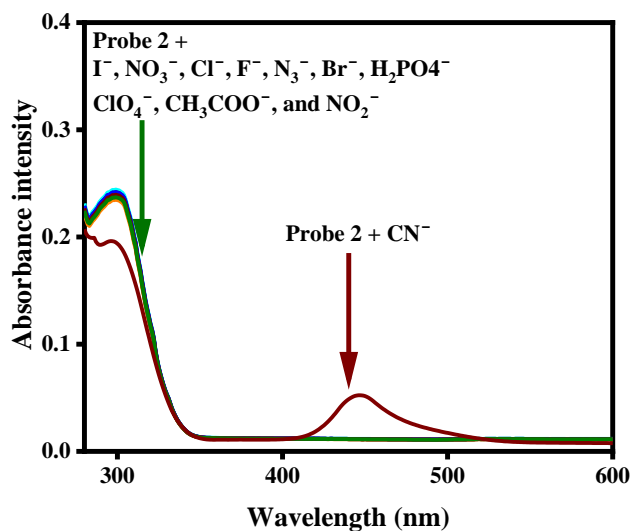

**Fig. S5.** The UV-vis spectral change of probe **2** (10  $\mu\text{M}$ ) in the presence of different anions.

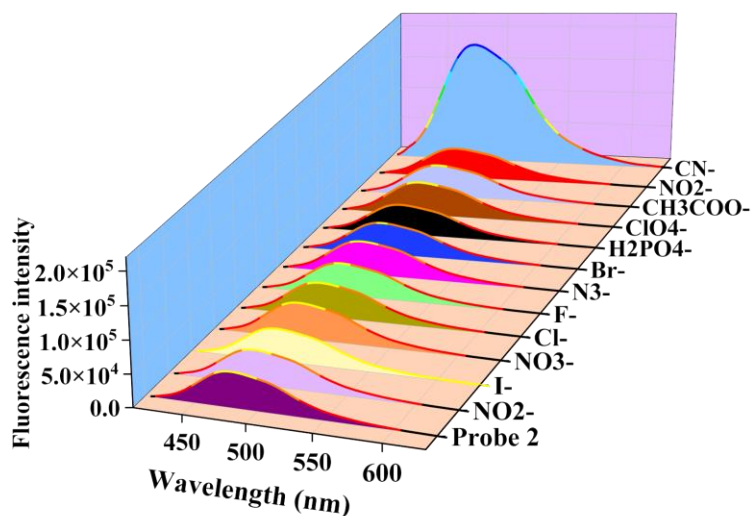

**Fig. S6.** The fluorescence spectral change of probe **2** (10  $\mu$ M) in the presence of different anions (Excitation wavelength = 410 nm).

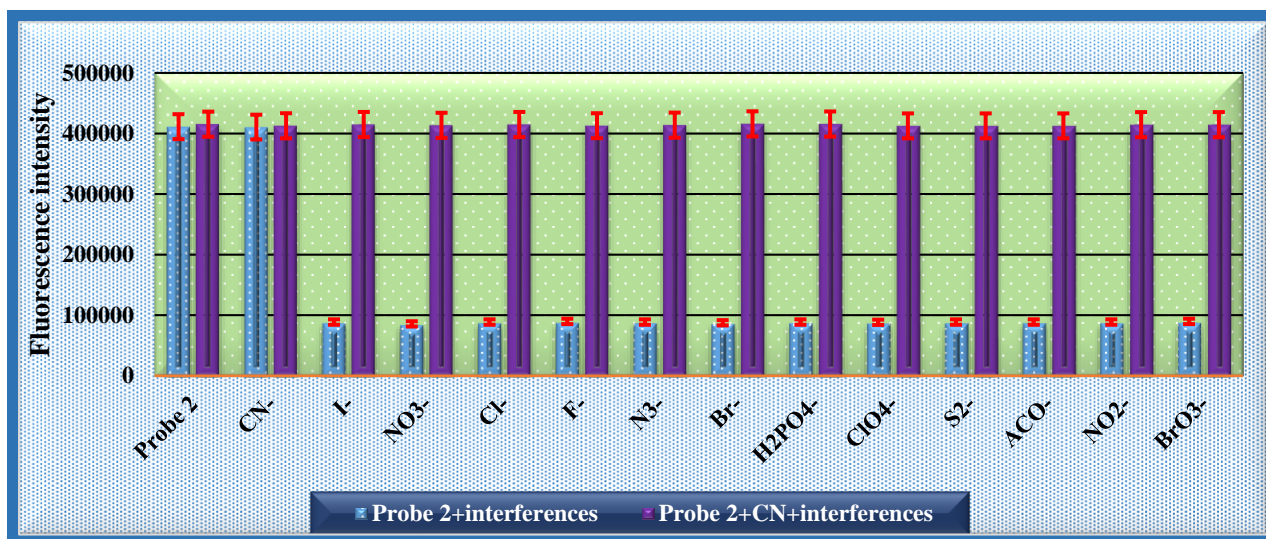

**Fig. S7.** The fluorescence change of probe **2** (10  $\mu$ M) containing 50 nM of  $\text{CN}^-$  ions in the presence of interferences (100 equiv).

**Table S1.** The comparison of LOD for  $\text{CN}^-$  and other features of probe **2** with already reported  $\text{CN}^-$  probes.

| Sensors | Aggregation induced emission enhancement (AIEE) | Piezofluorochromic behavior | Vapor phase detection | Detection in actual food Samples | Smartphone based detection | LOD (nM) | Ref. |
|---------|-------------------------------------------------|-----------------------------|-----------------------|----------------------------------|----------------------------|----------|------|
|         |                                                 |                             |                       |                                  |                            |          |      |

|                                                    |                     |                                        |               |               |               |                  |                  |
|----------------------------------------------------|---------------------|----------------------------------------|---------------|---------------|---------------|------------------|------------------|
| Schiff base based probe 2                          | Described in detail | Excellent piezofluorochromic character | Yes           | Yes           | Yes           | 6.17             | <b>This work</b> |
| Spiropyran and spironaphthoxazine based sensor     | Didn't display      | Didn't display                         | Not described | Not described | Not described | 91               | <sup>1</sup>     |
| Naphthopyranbenzothiazole core sensor              | Didn't display      | Didn't display                         | Not described | Not described | Not described | 330              | <sup>2</sup>     |
| aldehyde-appended salamo-type sensor               | Didn't display      | Didn't display                         | Not described | Not described | Not described | 80               | <sup>3</sup>     |
| Indoleoxazine functionalized compound              | Didn't display      | Didn't display                         | Not described | Explored      | Not described | 100              | <sup>4</sup>     |
| D- $\pi$ -A organic fluorophore                    | Didn't display      | Didn't display                         | Not described | Not described | Not described | 380              | <sup>5</sup>     |
| Pyridine based nanoparticles as cyanide ion sensor | Explored            | Didn't display                         | Not described | Not described | Not described | 8.2              | <sup>6</sup>     |
| Naphthopyran functionalized sensor                 | Explored            | Didn't display                         | Not described | Not described | Not described | 427              | <sup>7</sup>     |
| Oligothiophene-benzothiazole based sensor          | Didn't display      | Didn't display                         | Not described | Explored      | Not described | $15 \times 10^3$ | <sup>8</sup>     |
| Triphenylamine based probe                         | Explored            | Didn't display                         | Not described | Explored      | Not described | $2 \times 10^4$  | <sup>9</sup>     |
| Carbazole based sensor                             | Explored            | Didn't display                         | Not described | Not described | Not described | 67.4             | <sup>10</sup>    |

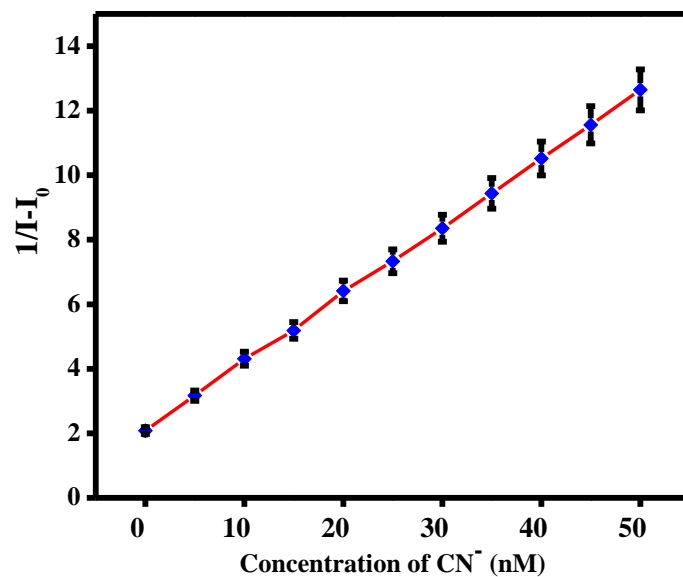

**Fig. S8.** The Benesi-Hildebrand plot of probe 2 (10 μM) between fluorescence response vs increasing concentrations of CN<sup>-</sup>.

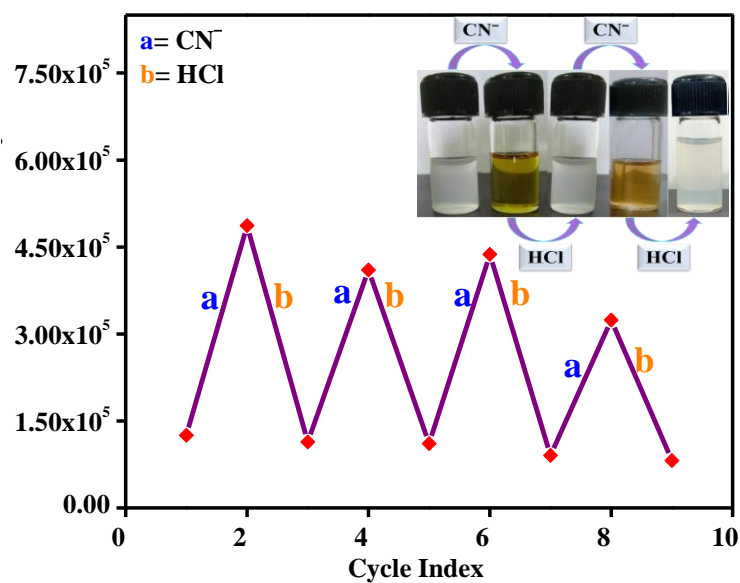

**Fig. S9.** The switchable fluorescence and colorimetric response of probe 2.

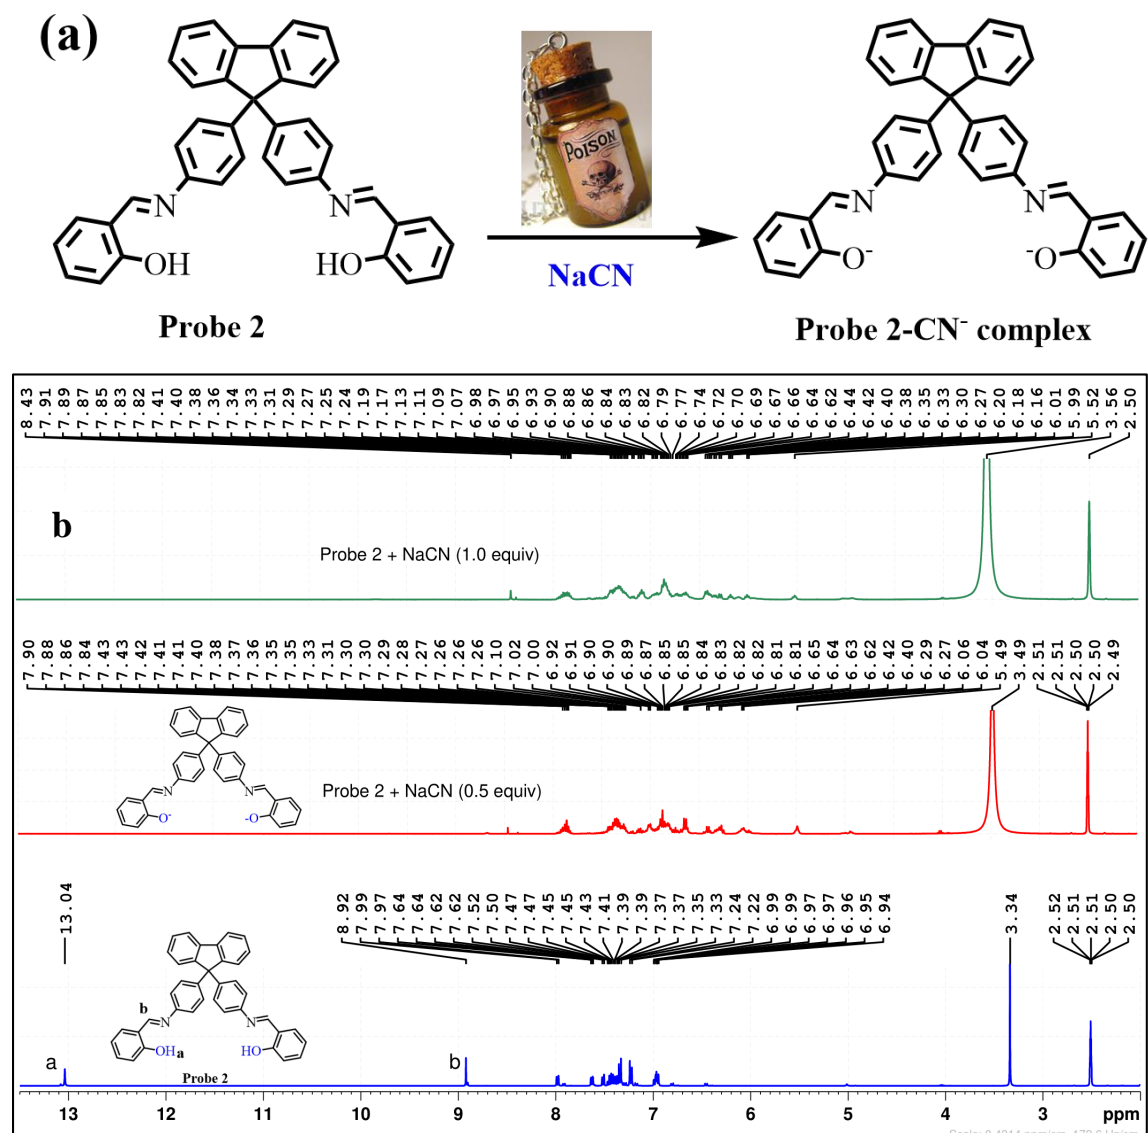

**Fig. S10.** The putative sensing mechanism (a) and <sup>1</sup>H NMR titration of probe 2 (b) upon addition of increasing amounts of CN<sup>-</sup>.



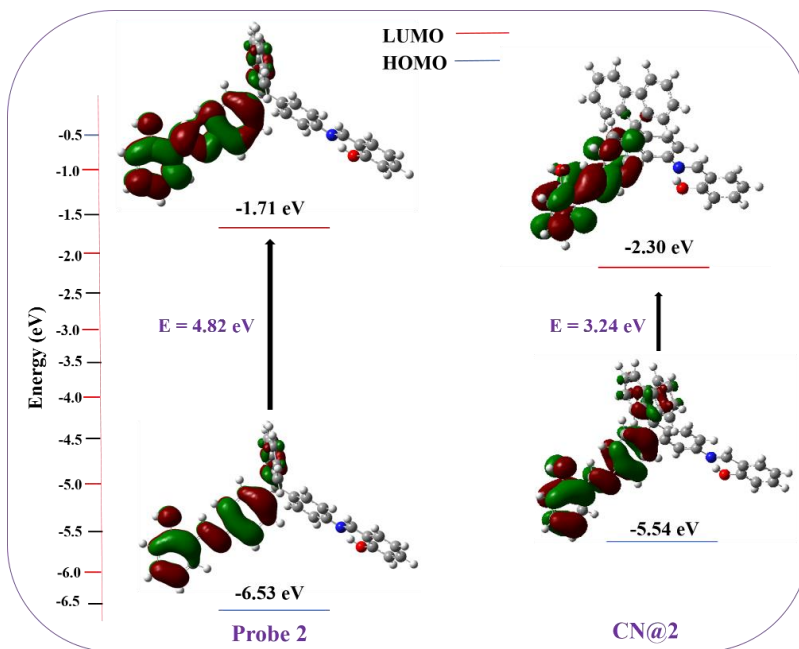

**Fig. S11.** Frontier molecular orbital (FMO) plots of probe **2** and its probe–CN<sup>−</sup> complex (achieved through Gaussian 09 program).

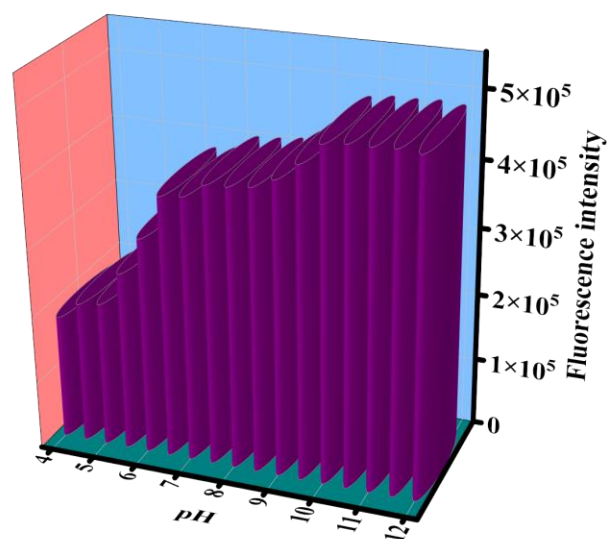

**Fig. S12.** Effect of pH on the enhanced fluorescence emission response of probe **2** towards CN<sup>−</sup>.

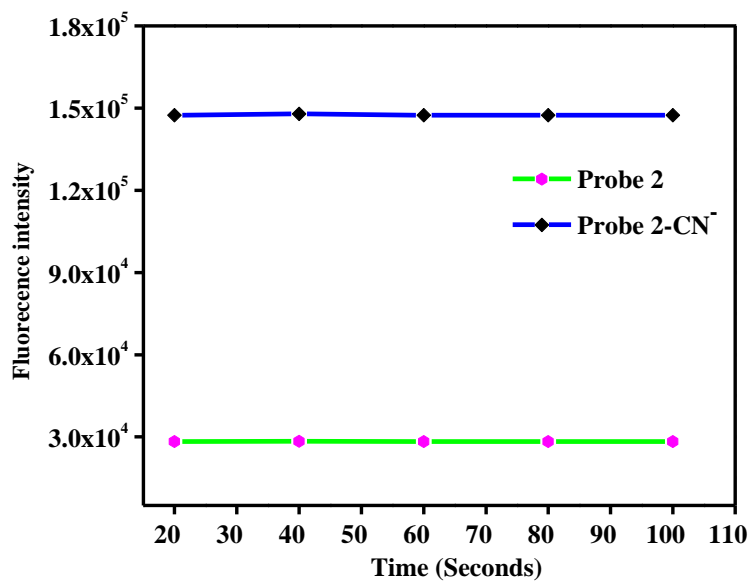

Fig. S13. Photostability analysis of probe 2 and 2-CN<sup>-</sup> complex.

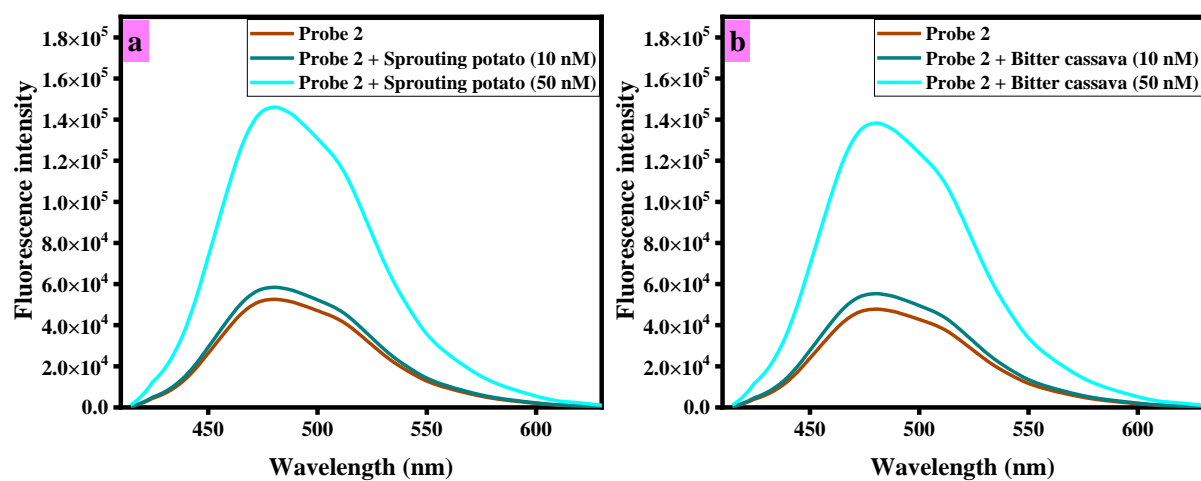

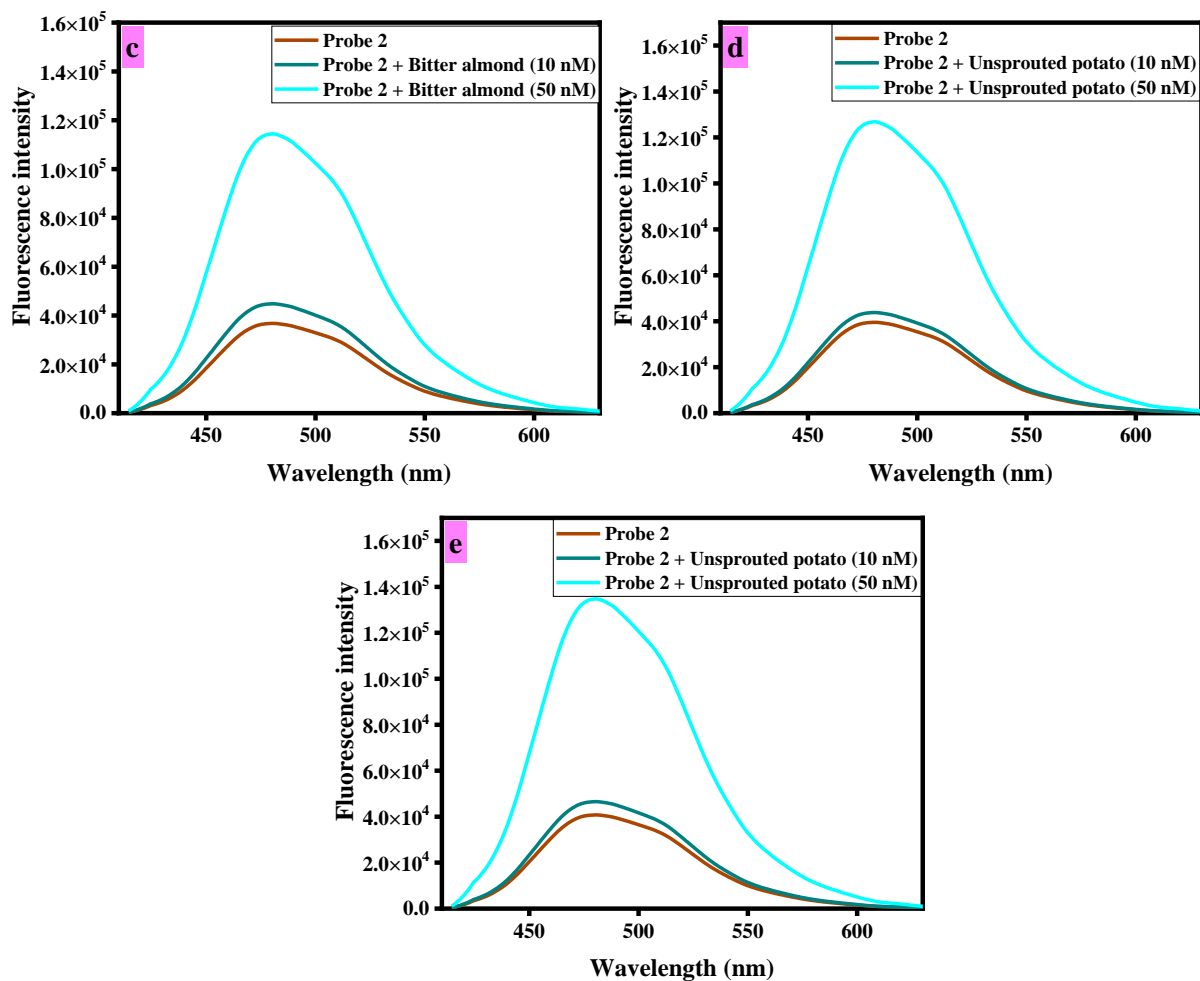

**Fig. S14.** The fluorescence spectral changes of probe 2 (10  $\mu$ M) towards endogenous cyanide in food samples (sprouting potato (a), bitter cassava (b), bitter almond (c), un-sprouted potatoes (d), and sweet almond (e)).

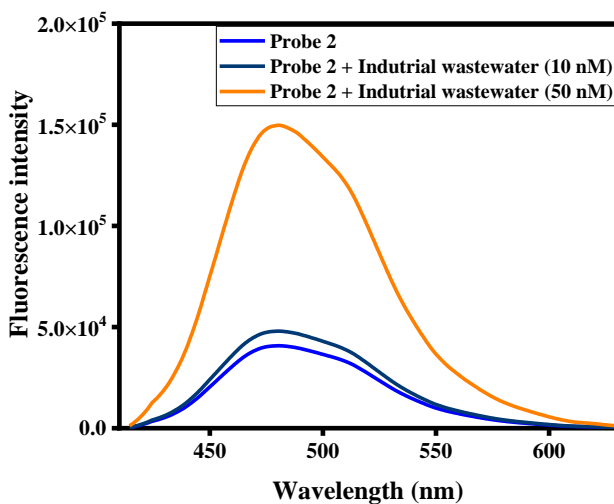

**Fig. S15.** The fluorescence spectra changes of probe **2** (10  $\mu\text{M}$ ) towards  $\text{CN}^-$  spiked industrial wastewater.

## References

- 1 S. Sanjabi, J. K. Rad and A. R. Mahdavian, *J. Photochem. Photobiol. A: Chem.*, 2022, **424**, 113626.
- 2 Q. Li, J. Chang, H. Shi, T. Niu, H. Dong and H. Mu, *Supramol. Chem.*, 2022, 1-7.
- 3 L.-M. Pu, R.-Y. Li, Z.-Z. Chen, W.-B. Xu, H.-T. Long and W.-K. Dong, *J. Photochem. Photobiol. A: Chem.*, 2022, 113883.
- 4 Z. Zhang, G. Chen, W. Pan, Y. Bi, S. Shen, X. Cao, X. Pang and Y. Zhu, *J. Mol. Struct.*, 2022, **1251**, 131893.
- 5 C. Liu, D. Zhang, S. Ye, T. Chen and R. Liu, *Spectrochim. Acta A Mol. Biomol. Spectrosc.*, 2022, **267**, 120593.
- 6 R. Nazarian, H. R. Darabi, K. Aghapoor, R. Firouzi and H. Sayahi, *Chem. Comm.*, 2020, **56**, 8992-8995.
- 7 Z. M. Dong, H. Ren, J. N. Wang and Y. Wang, *Microchem. J.*, 2020, **155**, 104676.
- 8 Q. Niu, L. Lan, T. Li, Z. Guo, T. Jiang, Z. Zhao, Z. Feng and J. Xi, *Sens. Actuators B Chem.*, 2018, **276**, 13-22.
- 9 X. Wen, L. Yan and Z. Fan, *Spectrochim. Acta A Mol. Biomol. Spectrosc.*, 2020, **241**, 118664.
- 10 L. Tang, L. Zhou, A. Liu, X. Yan, K. Zhong, X. Liu, X. Gao and J. Li, *Dyes Pigm.*, 2021, **186**, 109034.

Compound 1 (1H NMR, 500 MHz, DMSO-d6)

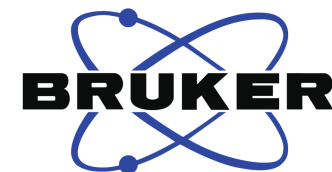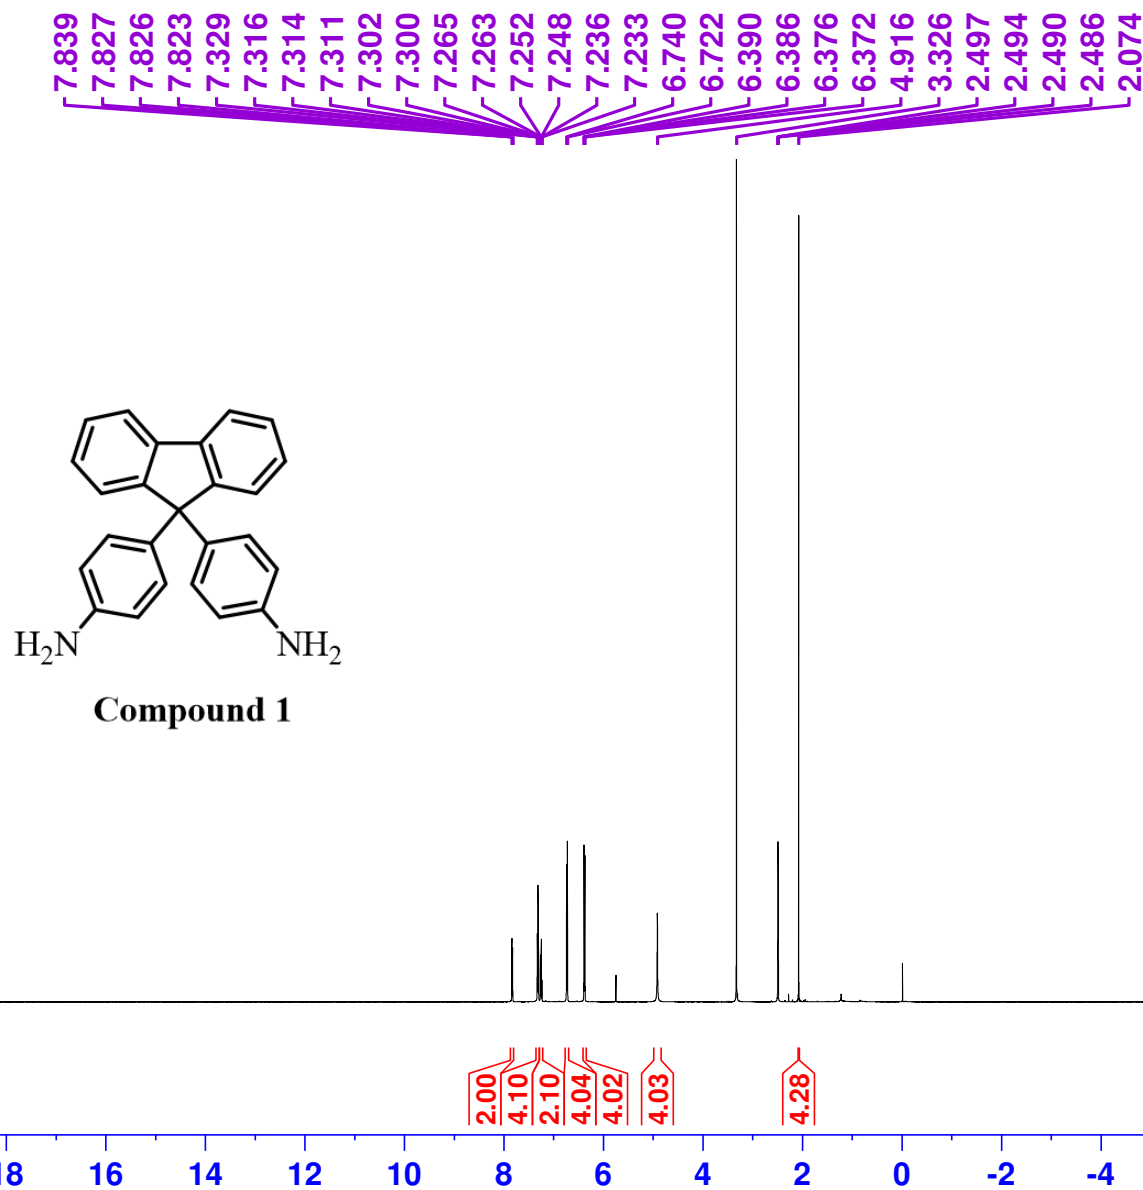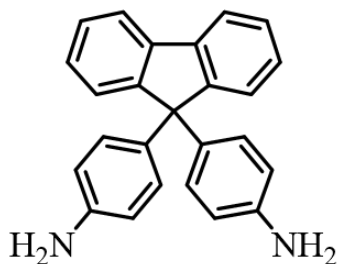

Compound 1

Current Data Parameters  
 NAME Shumaila Majeed  
 EXPNO  
 PROCNO

F2 - Acquisition Parameters

Date\_ 20181120  
 Time 11.56 h  
 INSTRUM spect  
 PROBHD Z119470\_0109  
 PULPROG zg  
 TD 65536  
 SOLVENT DMSO  
 NS 23  
 DS 0  
 SWH 15000.000 Hz  
 FIDRES 0.457764 Hz  
 AQ 2.1845334 sec  
 RG 52.58  
 DW 33.333 usec  
 DE 6.50 usec  
 TE 294.4 K  
 D1 3.0000000 sec  
 TD0 1  
 SFO1 500.1830011 MHz  
 NUC1 1H  
 P1 11.60 usec  
 PLW1 14.0000000 W

F2 - Processing parameters

SI 131072  
 SF 500.1800093 MHz  
 WDW EM  
 SSB 0  
 LB 0.10 Hz  
 GB 0  
 1.00

Compound 1 (1H NMR, 500 MHz, DMSO-d6)

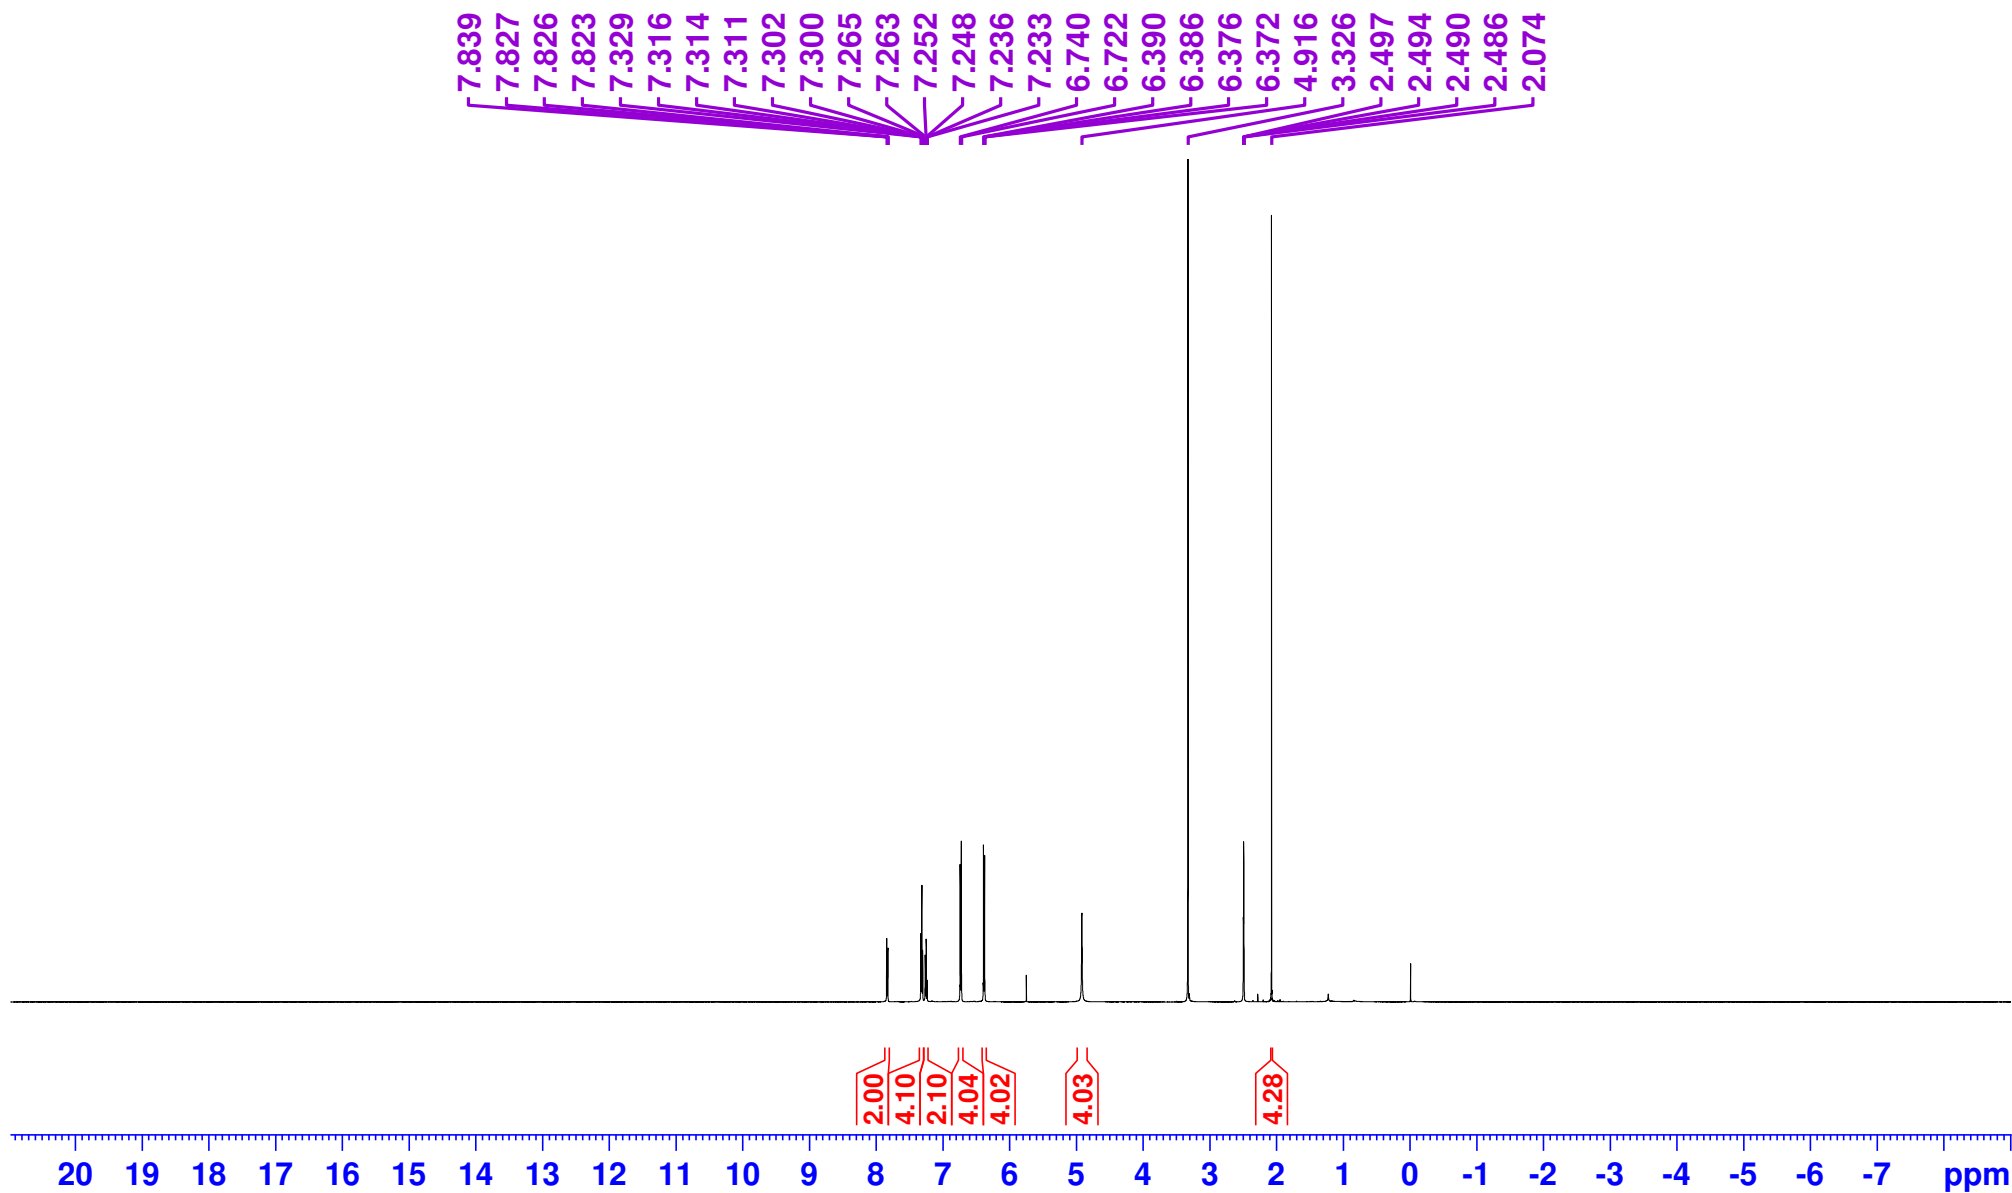

Compound 1 (1H NMR, 500 MHz, DMSO-d6)

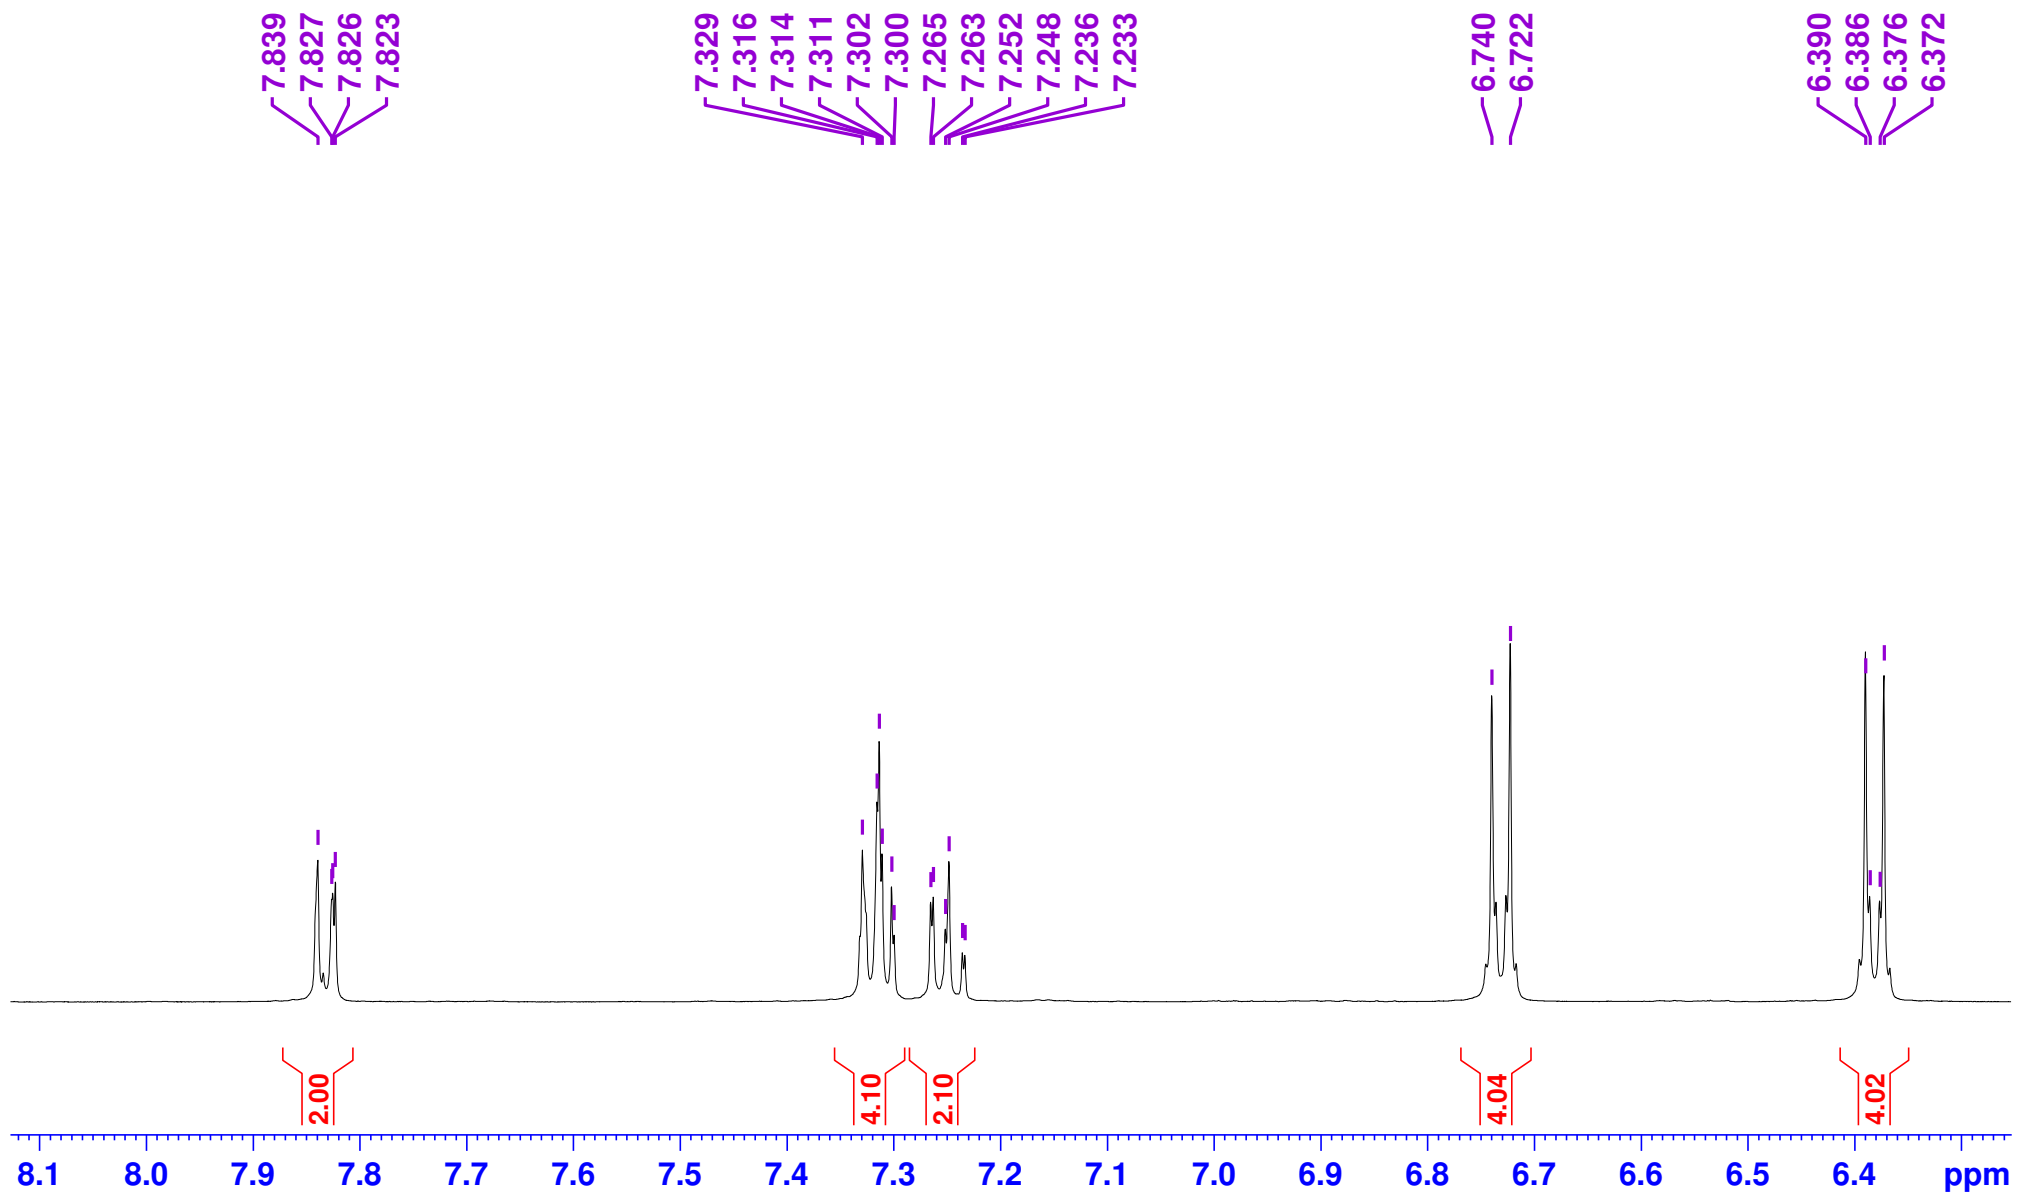

Compound 1 (1H NMR, 500 MHz, DMSO-d6)

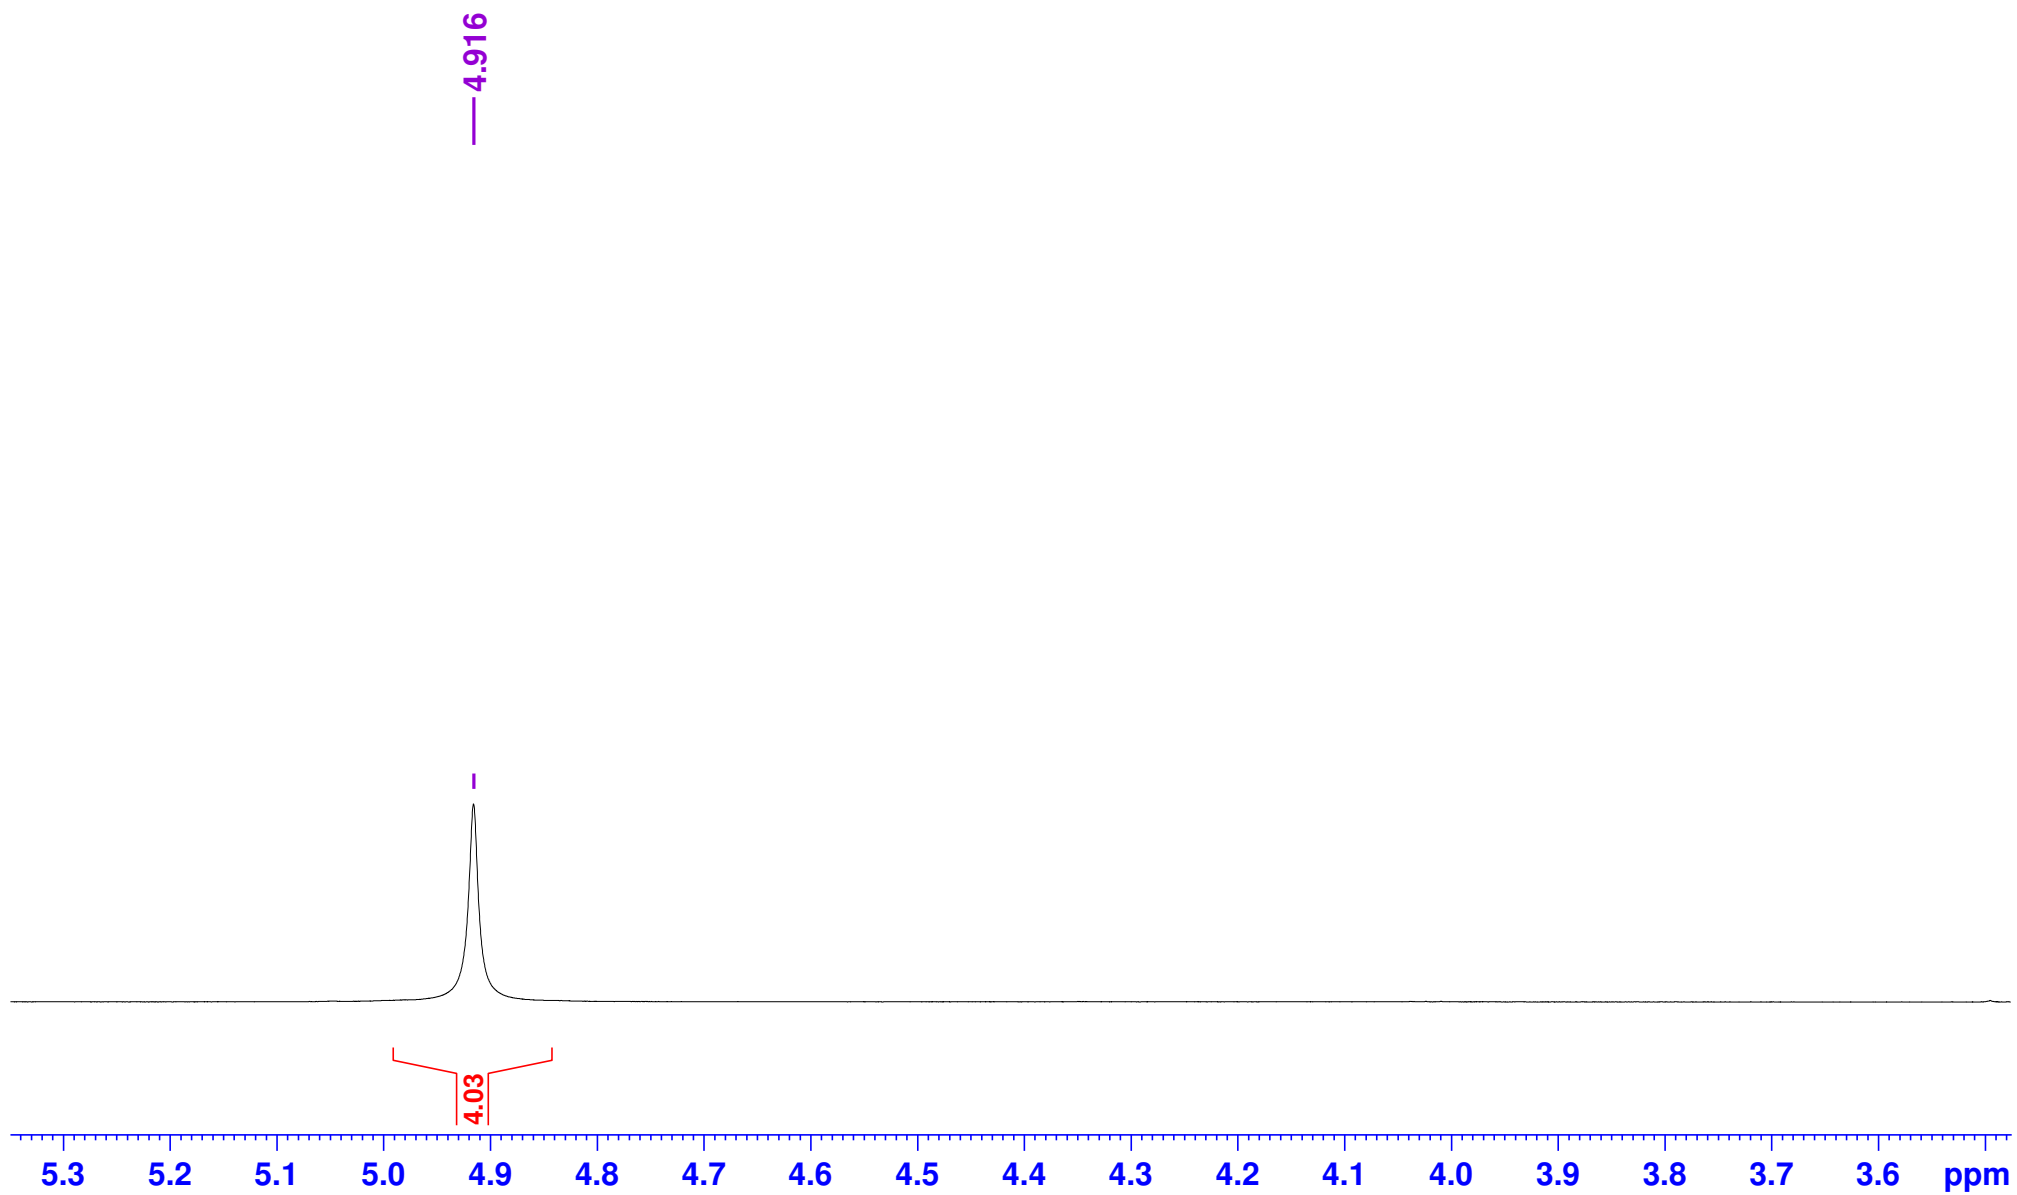



Compound 1 (1H NMR, 500 MHz, DMSO-d6)

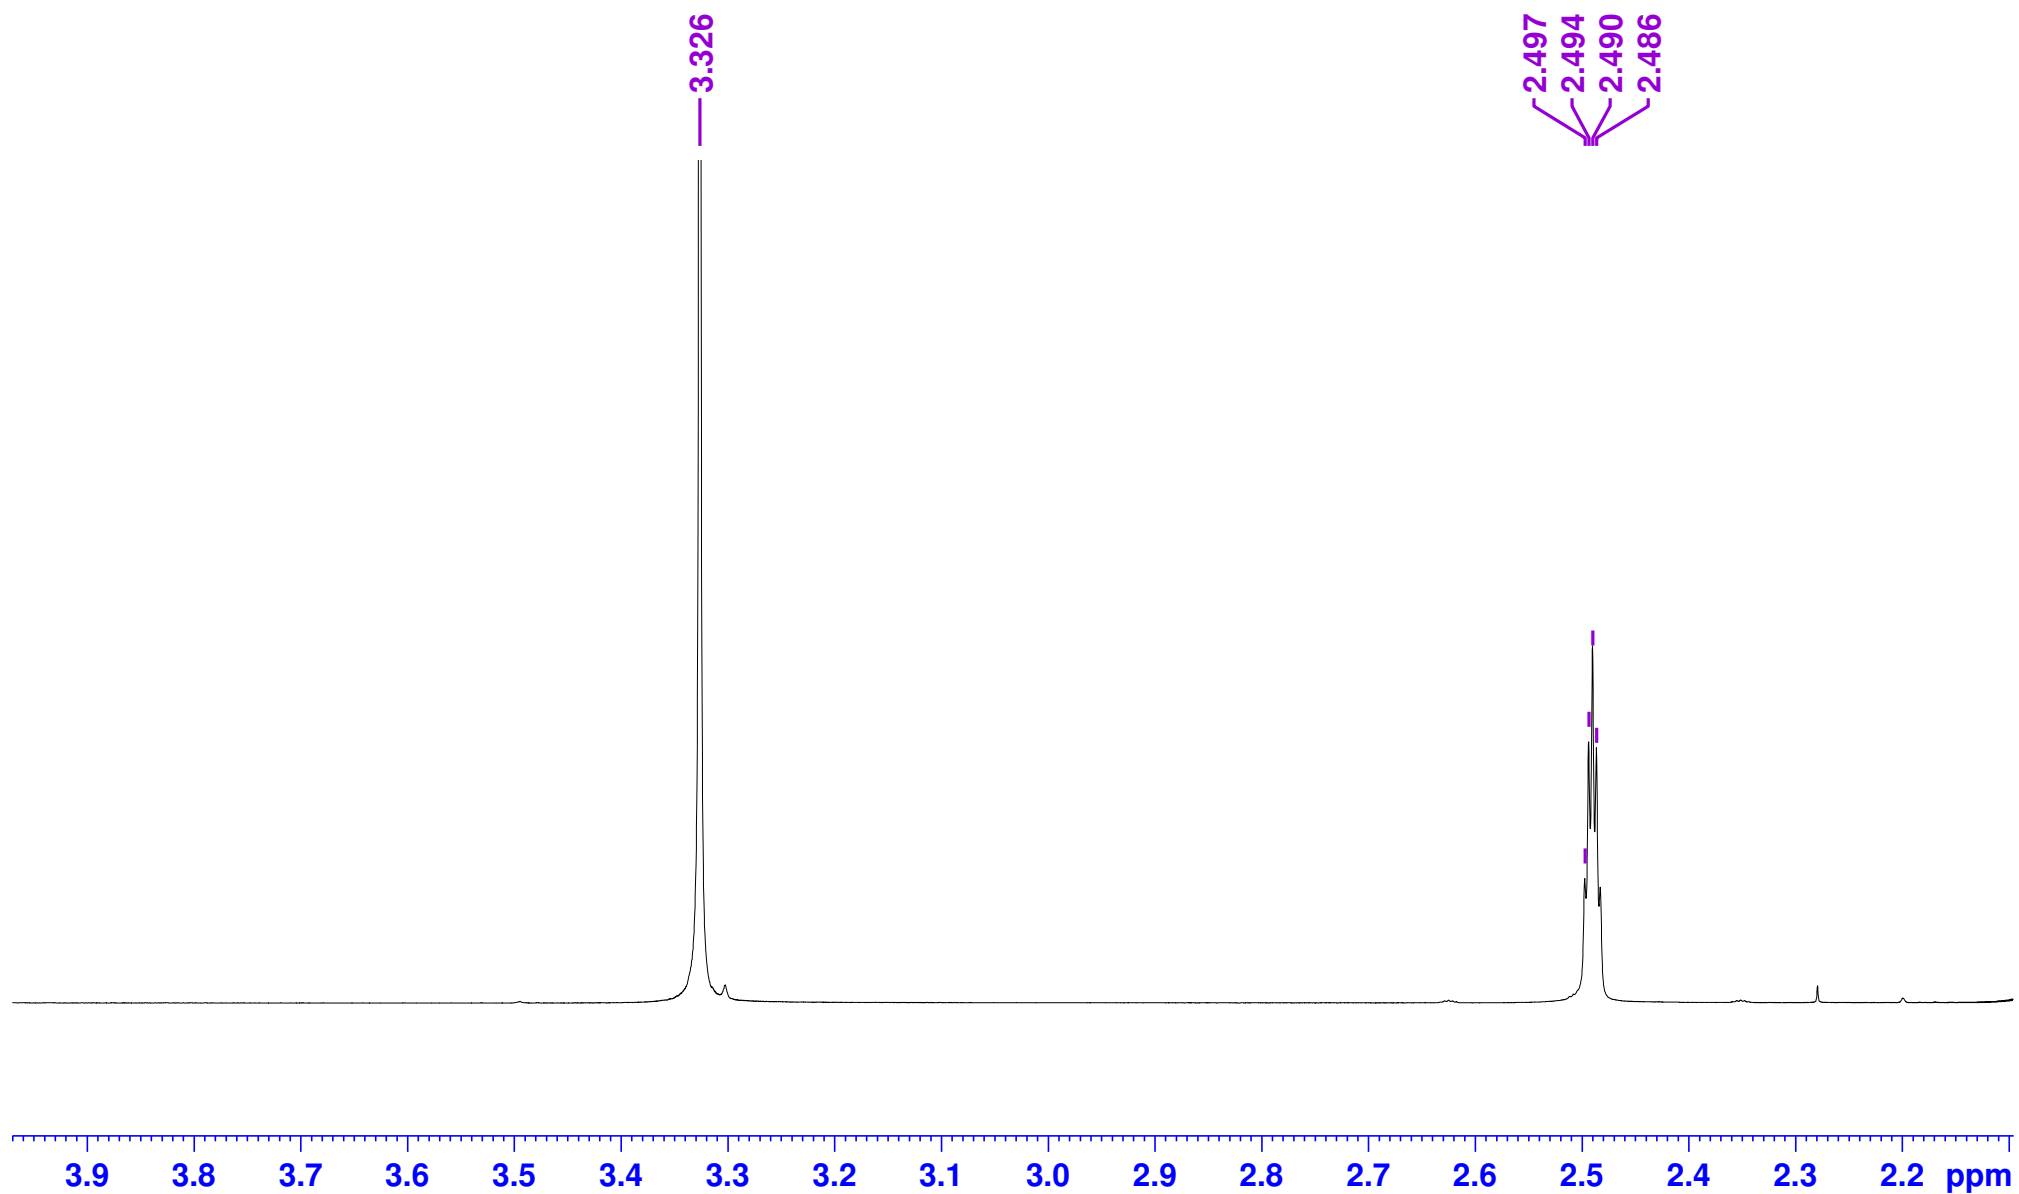

Compound 1 (13C NMR, 125 MHz, DMSO-d6)



Current Data Parameters  
NAME Shumaila Maj  
EXPNO  
PROCNO

F2 - Acquisition Parameters

Date\_ 20190122  
Time 7.02 h  
INSTRUM spect  
PROBHD z119470\_0109  
PULPROG zgdc30  
TD 65536  
SOLVENT DMSO  
NS 300  
DS 0  
SWH 37878.789 Hz  
FIDRES 1.155969 Hz  
AQ 0.8650752 sec  
RG 188.37  
DW 13.200 usec  
DE 6.50 usec  
TE 294.5 K  
D1 2.00000000 sec  
D11 0.03000000 sec  
TD0 1  
SFO1 125.7829380 MHz  
NUC1 13C  
P0 3.10 usec  
P1 9.30 usec  
PLW1 80.00000000 W  
SFO2 500.1820007 MHz  
NUC2 1H  
CPDPRG[2] waltz16  
PCPD2 80.00 usec  
PLW2 14.00000000 W  
PLW12 0.29435000 W

F2 - Processing parameters

SI 131072  
SF 125.7703616 MHz  
WDW EM  
SSB 0  
LB 1.00 Hz  
GB 0  
PC 1.40

156.440  
152.125  
139.784  
136.445  
129.128  
128.103  
127.726  
126.389  
120.794  
115.374

64.062  
40.480  
40.313  
40.146  
39.979  
39.812  
39.645  
39.478

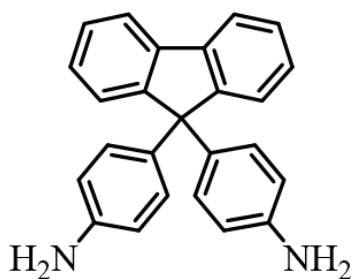

Compound 1

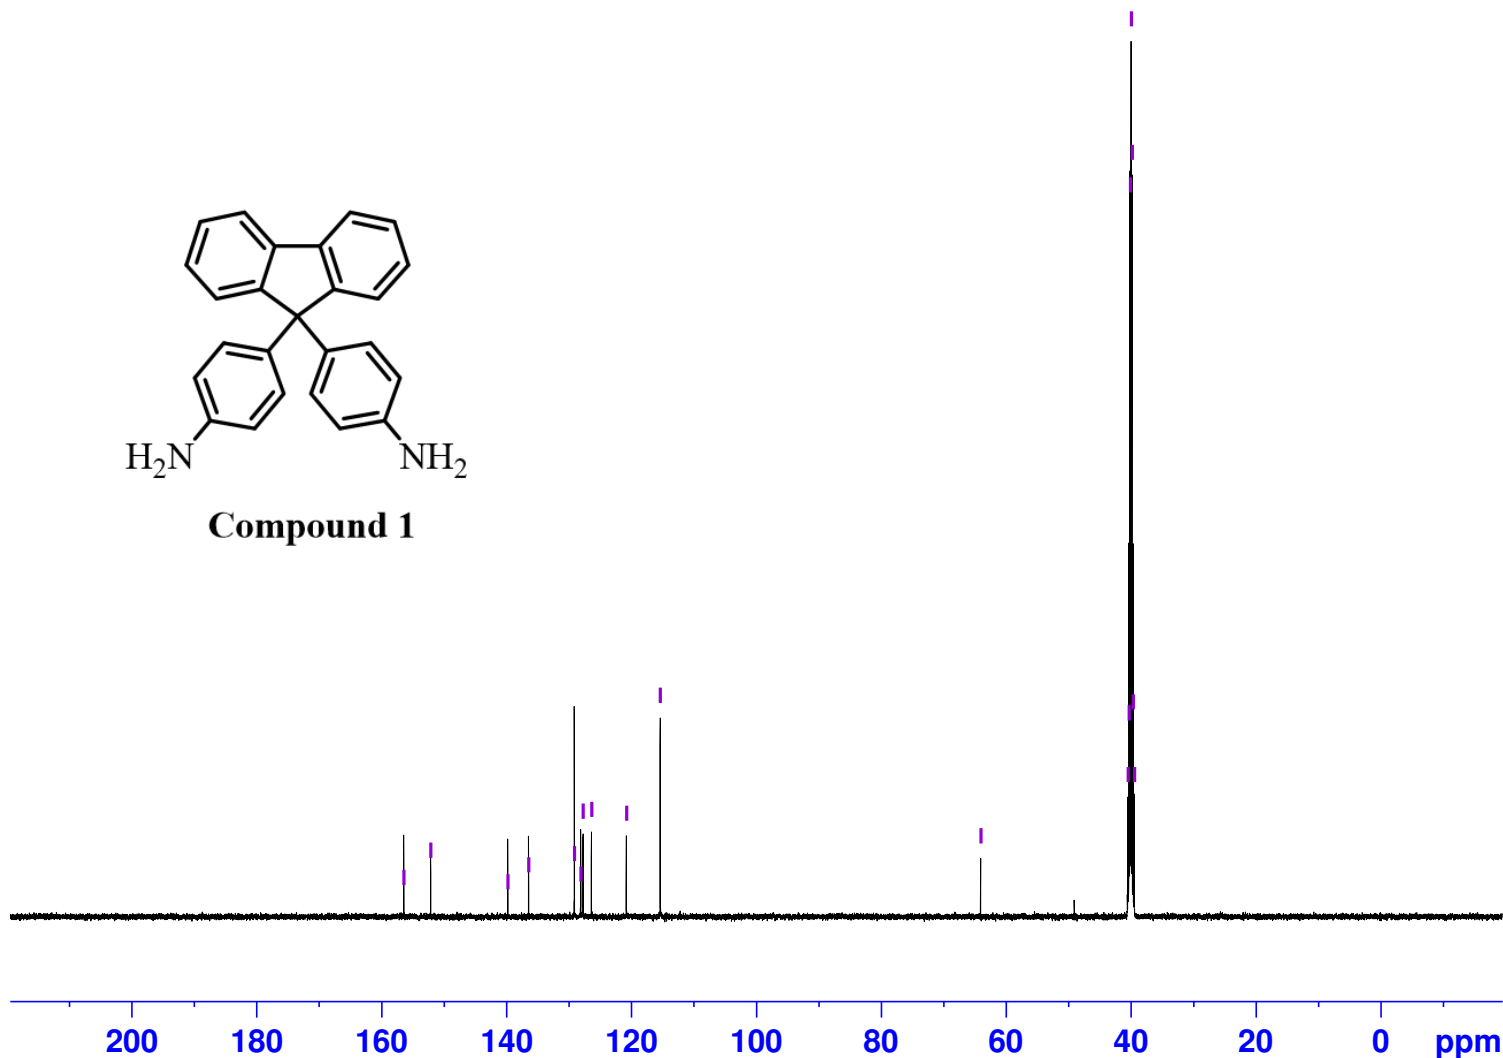

Compound 1 (13C NMR, 125 MHz, DMSO-d6)

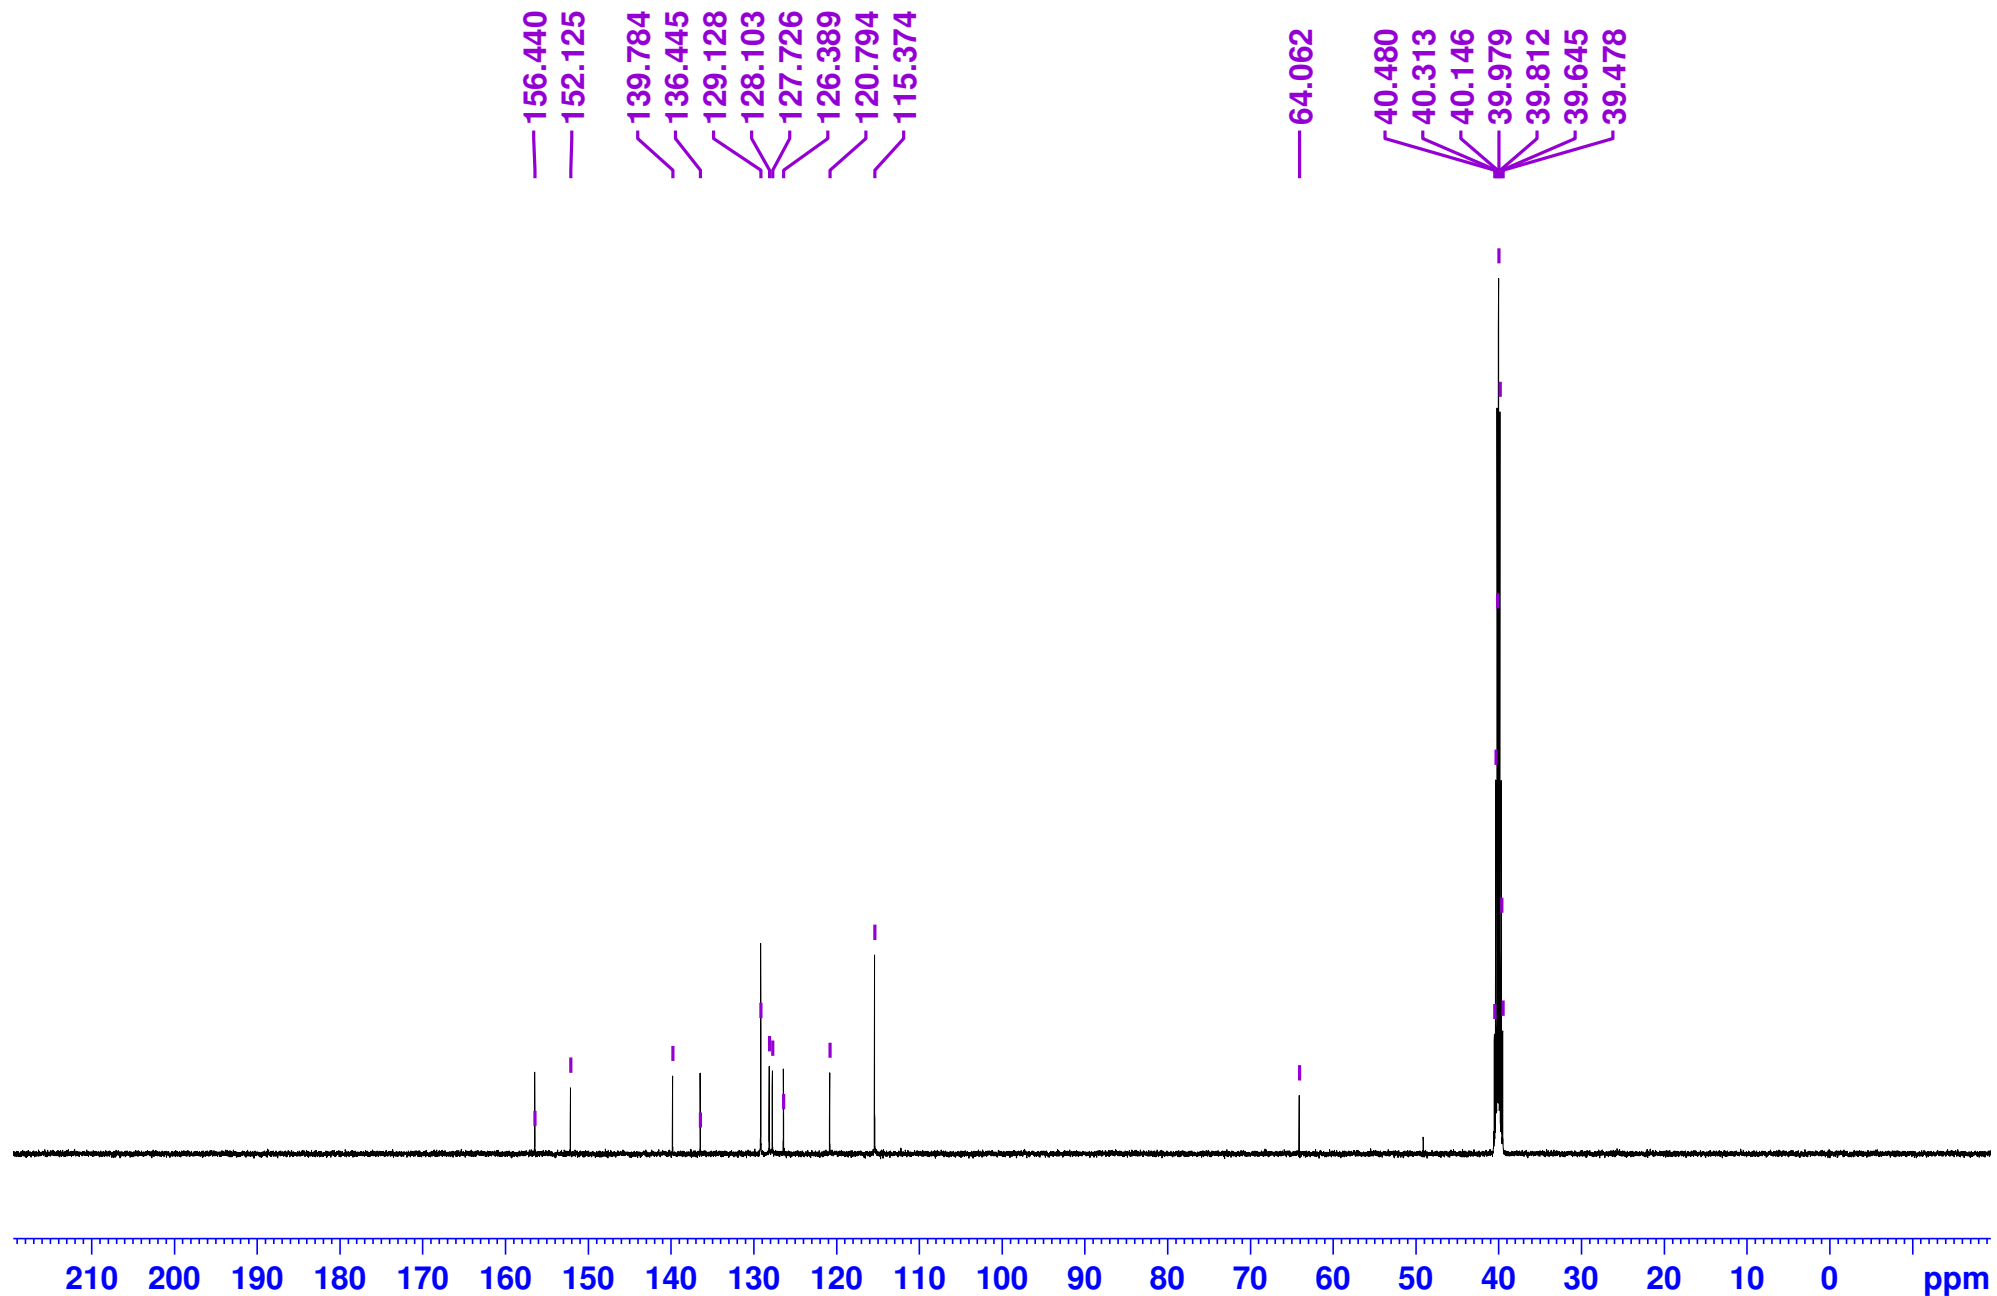

Compound 1 (13C NMR, 125 MHz, DMSO-d6)

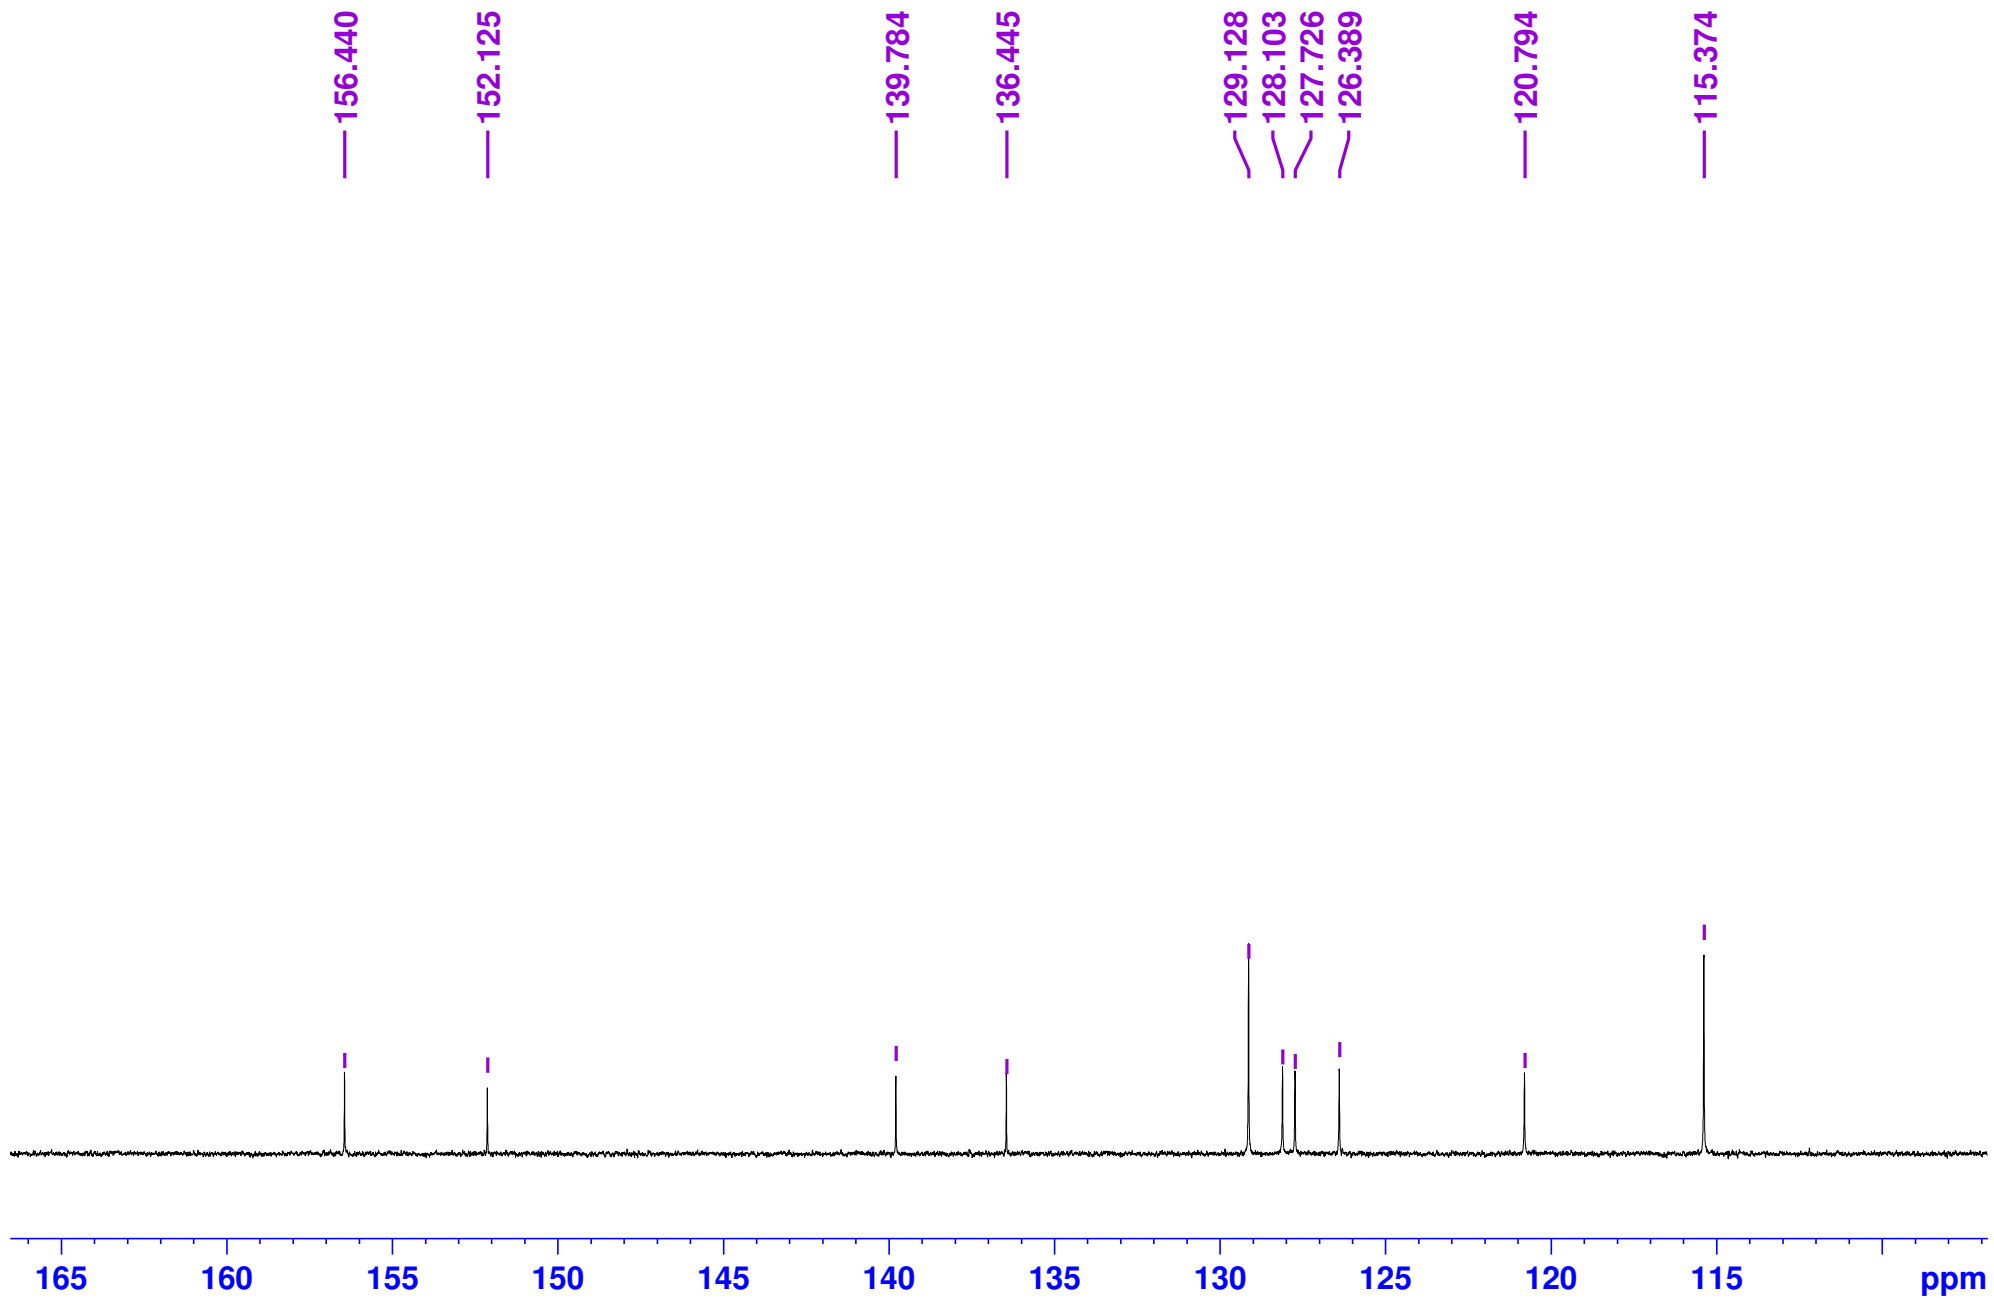

Compound 1 (13C NMR, 125 MHz, DMSO-d6)

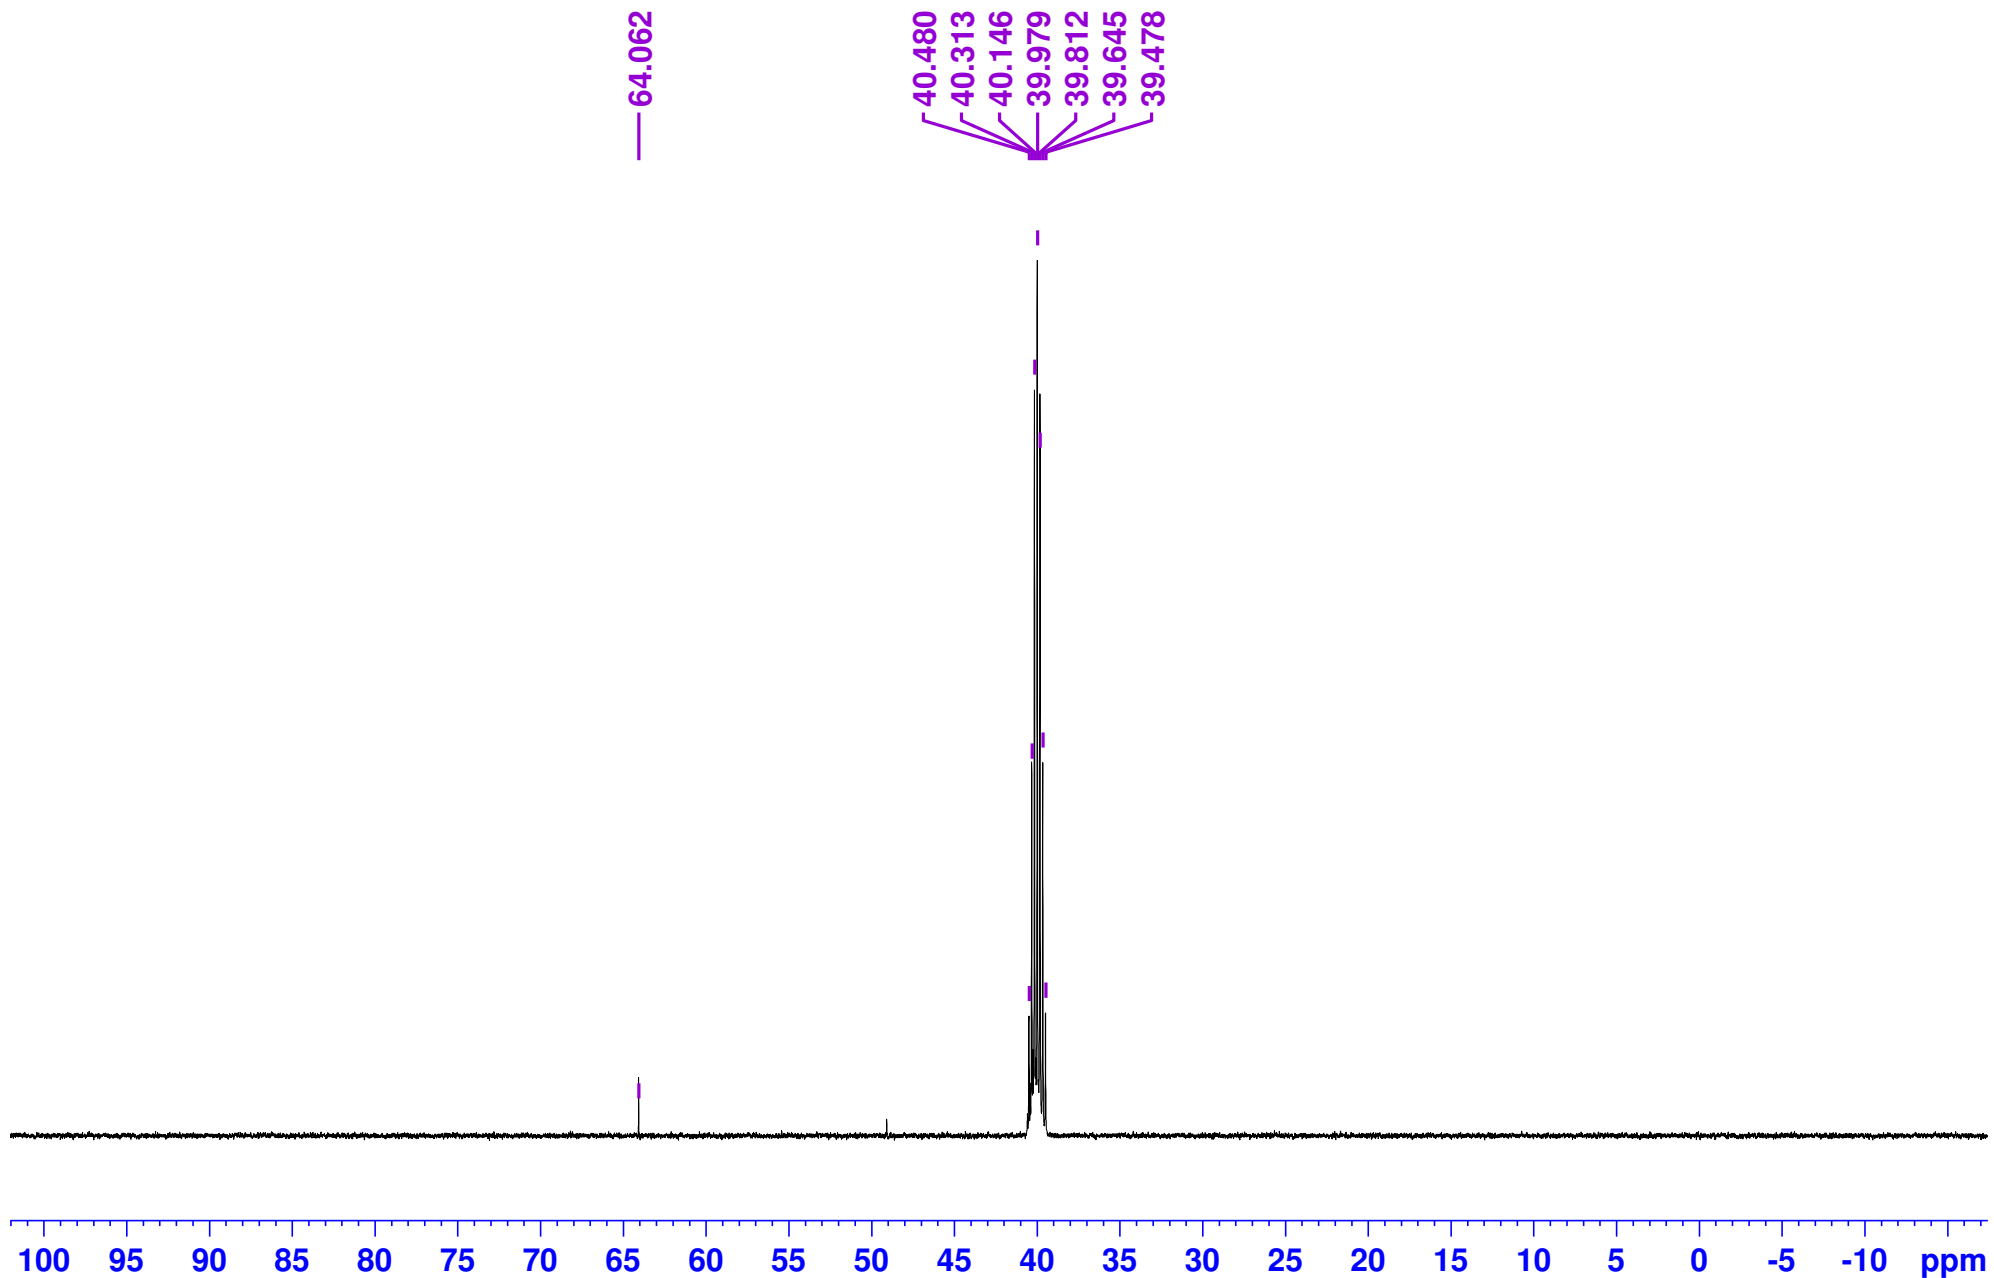

S21

Compound 2 (1H NMR, 400 MHz, CDCl3)

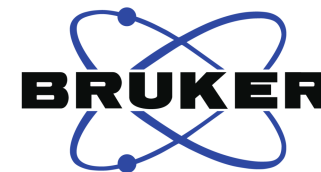

— 13.259

8.605  
7.841  
7.822  
7.473  
7.454  
7.449  
7.446  
7.430  
7.427  
7.412  
7.409  
7.404  
7.399  
7.394  
7.384  
7.380  
7.376  
7.363  
7.361  
7.344  
7.342  
7.319  
7.298  
7.284  
7.198  
7.177  
7.060  
7.050  
7.039  
7.038  
6.974  
6.972  
6.955

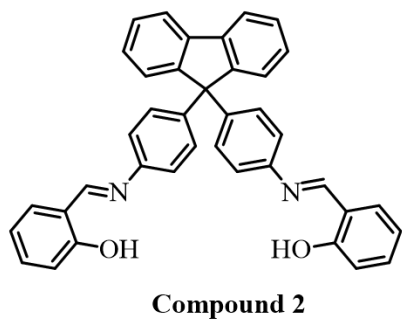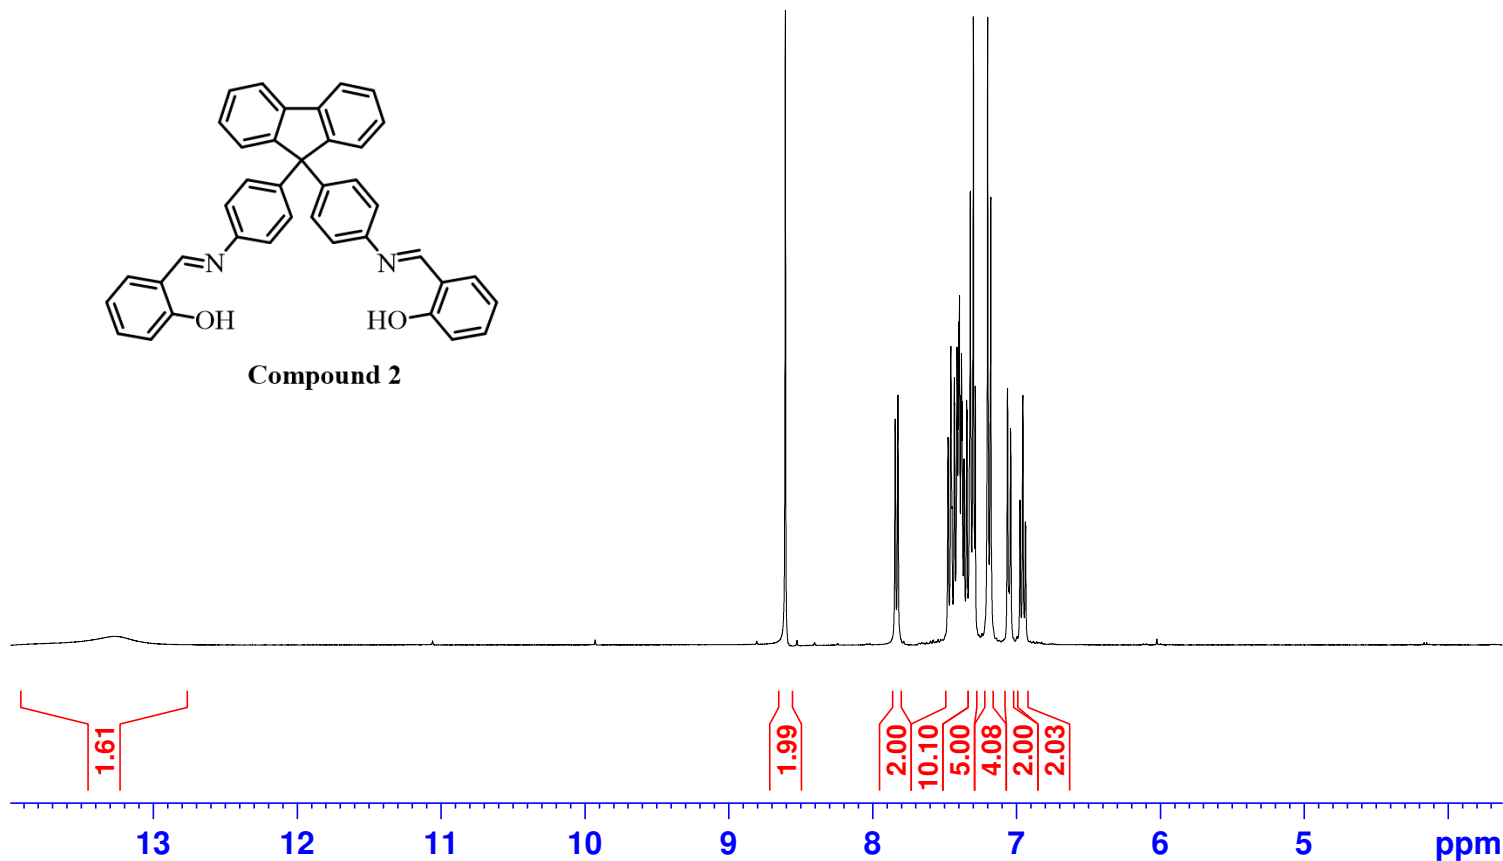

Current Data Parameters  
NAME Shumaila Majeed  
EXPNO  
PROCNO

F2 - Acquisition Parameters  
Date\_ 20190718  
Time 16.33 h  
INSTRUM spect  
PROBHD Z116098\_0621  
PULPROG zg30  
TD 65536  
SOLVENT CDCl3  
NS 16  
DS 2  
SWH 5597.015 Hz  
FIDRES 0.170807 Hz  
AQ 5.8545494 sec  
RG 78.01  
DW 89.333 usec  
DE 6.50 usec  
TE 298.0 K  
D1 1.00000000 sec  
TD0 1  
SFO1 400.1328009 MHz  
NUC1 1H  
P1 10.00 usec  
PLW1 16.68099976 W

F2 - Processing parameters  
SI 65536  
SF 400.1300000 MHz  
WDW EM  
SSB 0  
LB 0.30 Hz  
GB 0  
PC 1.00

Compound 2 (1H NMR, 400 MHz, CDCl3)

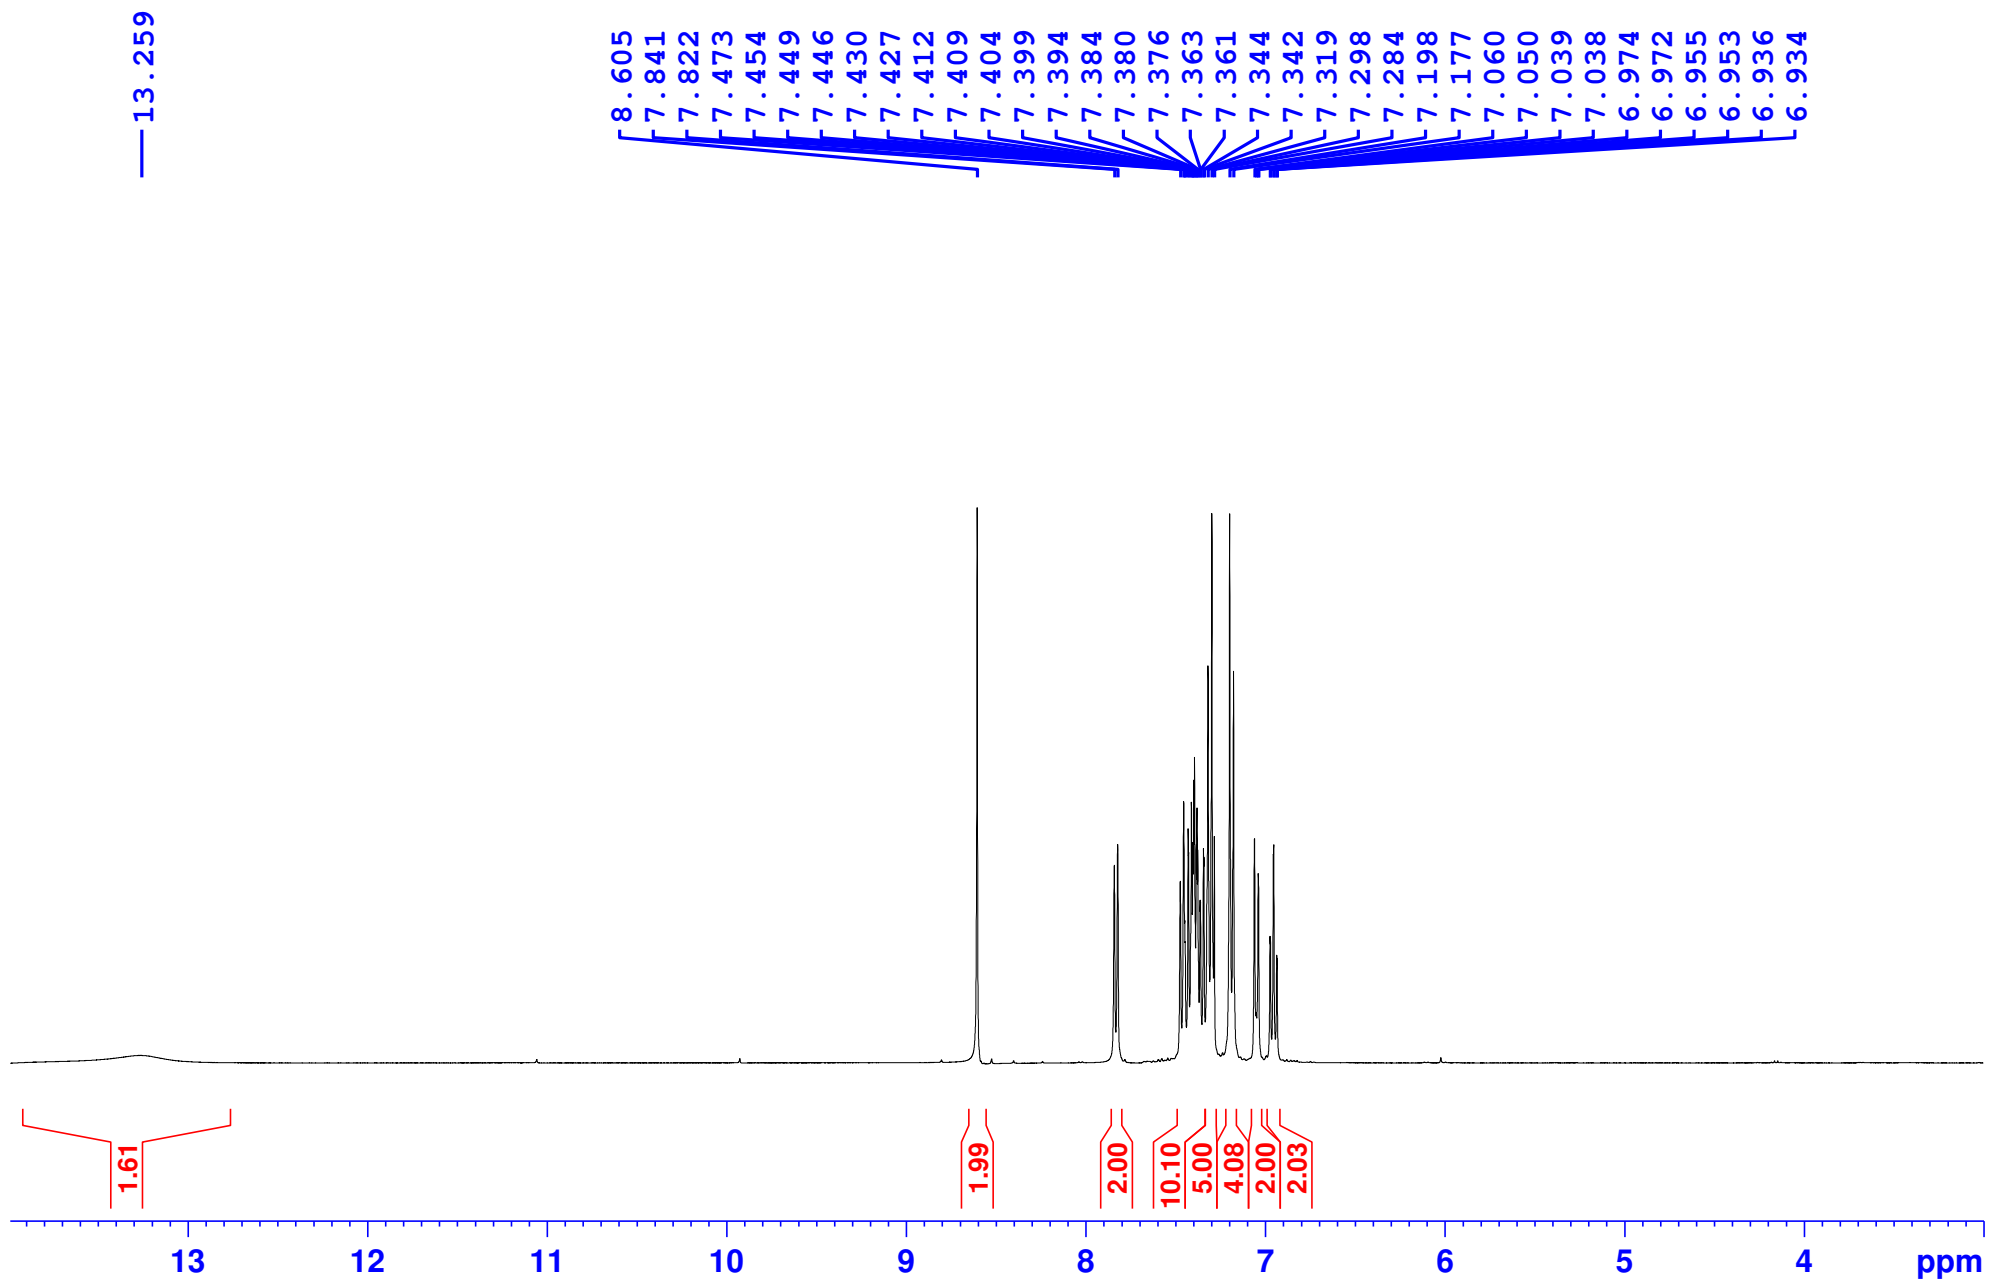

Compound 2 (1H NMR, 400 MHz, CDCl3)

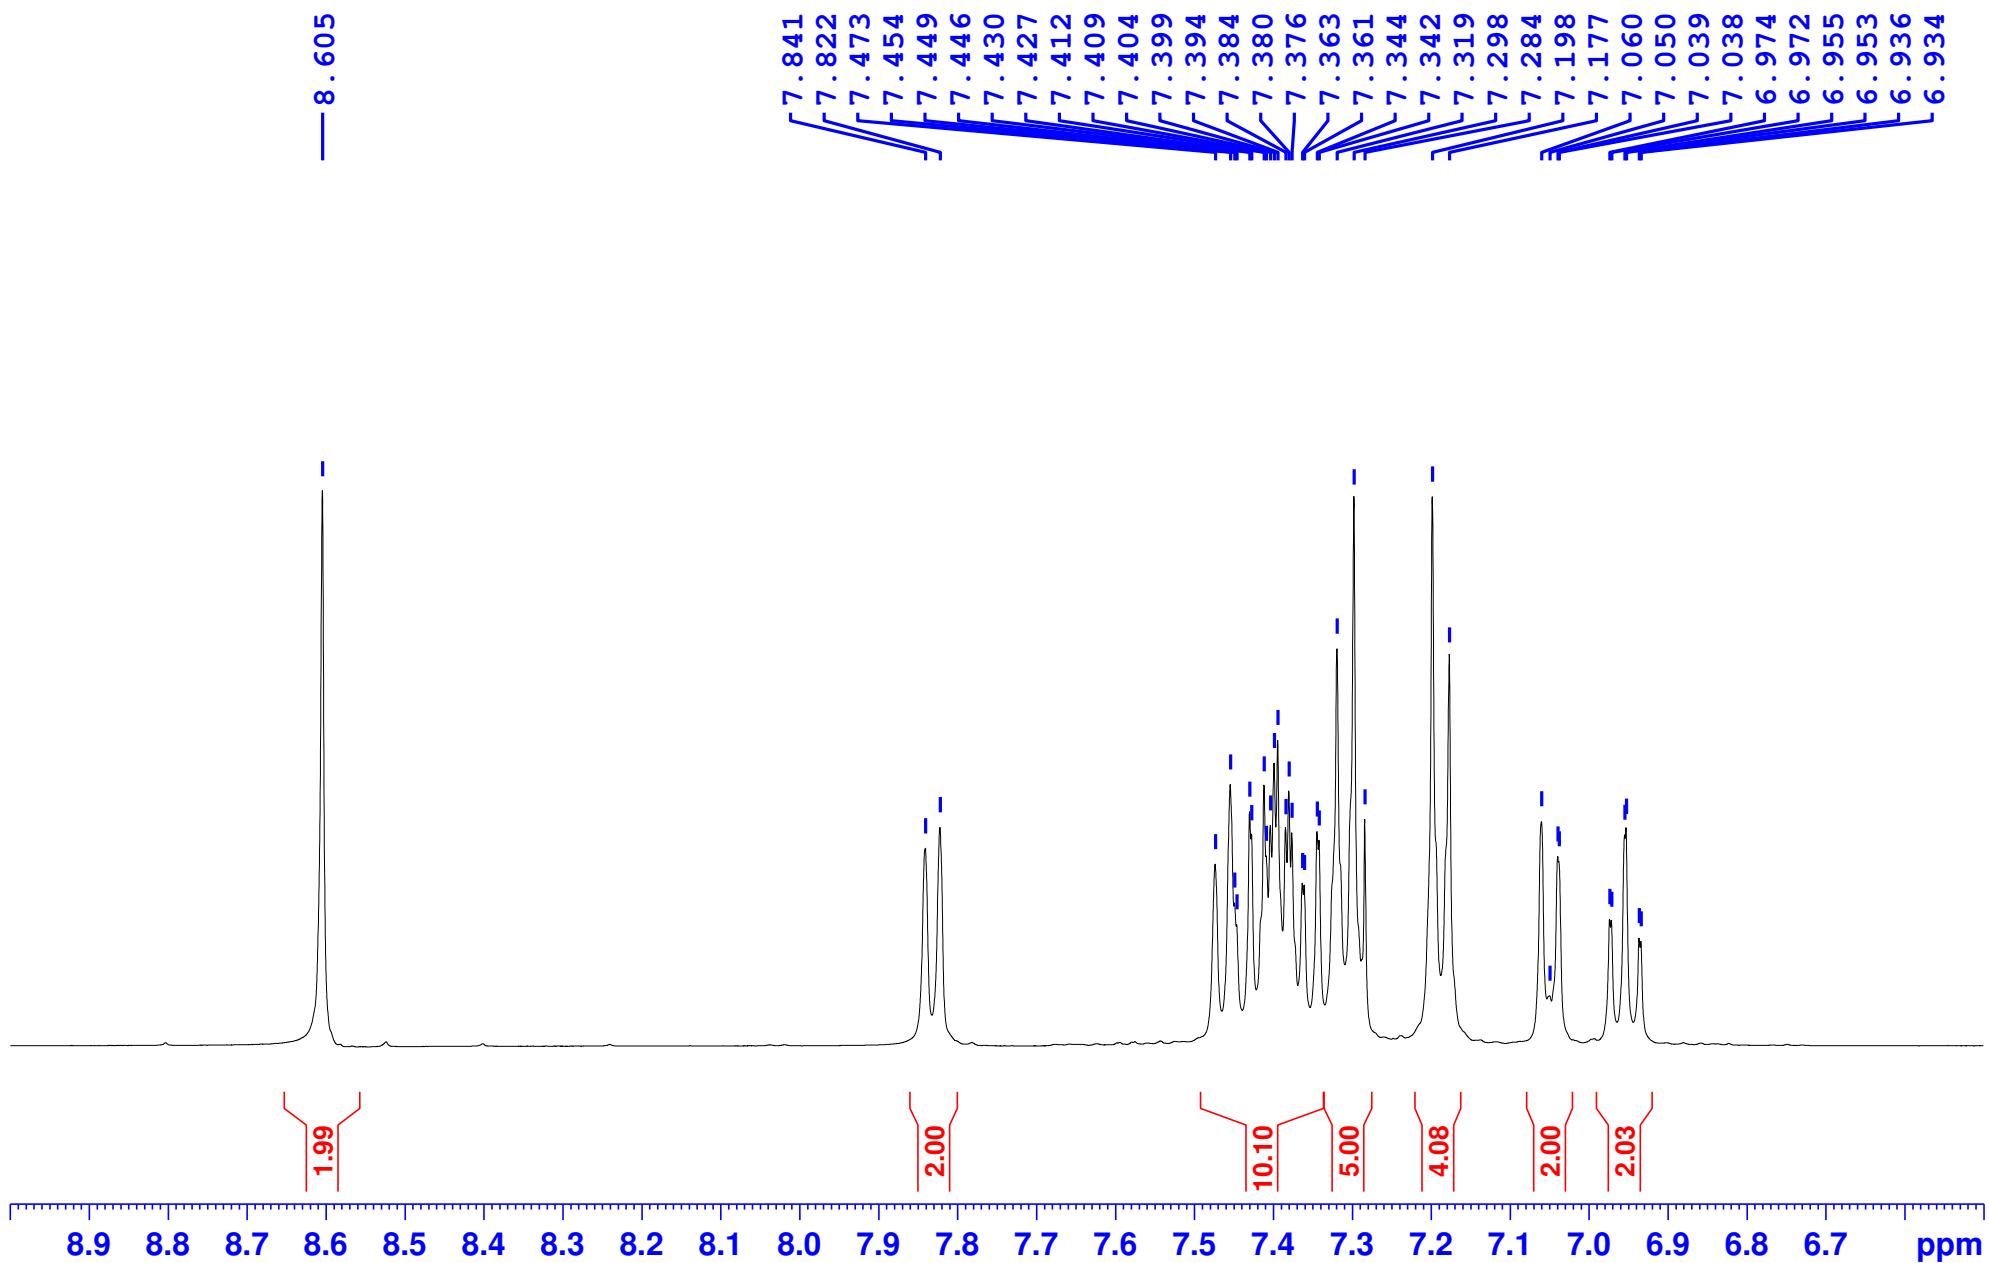



Compound 2 (1H NMR, 400 MHz, CDCl3)

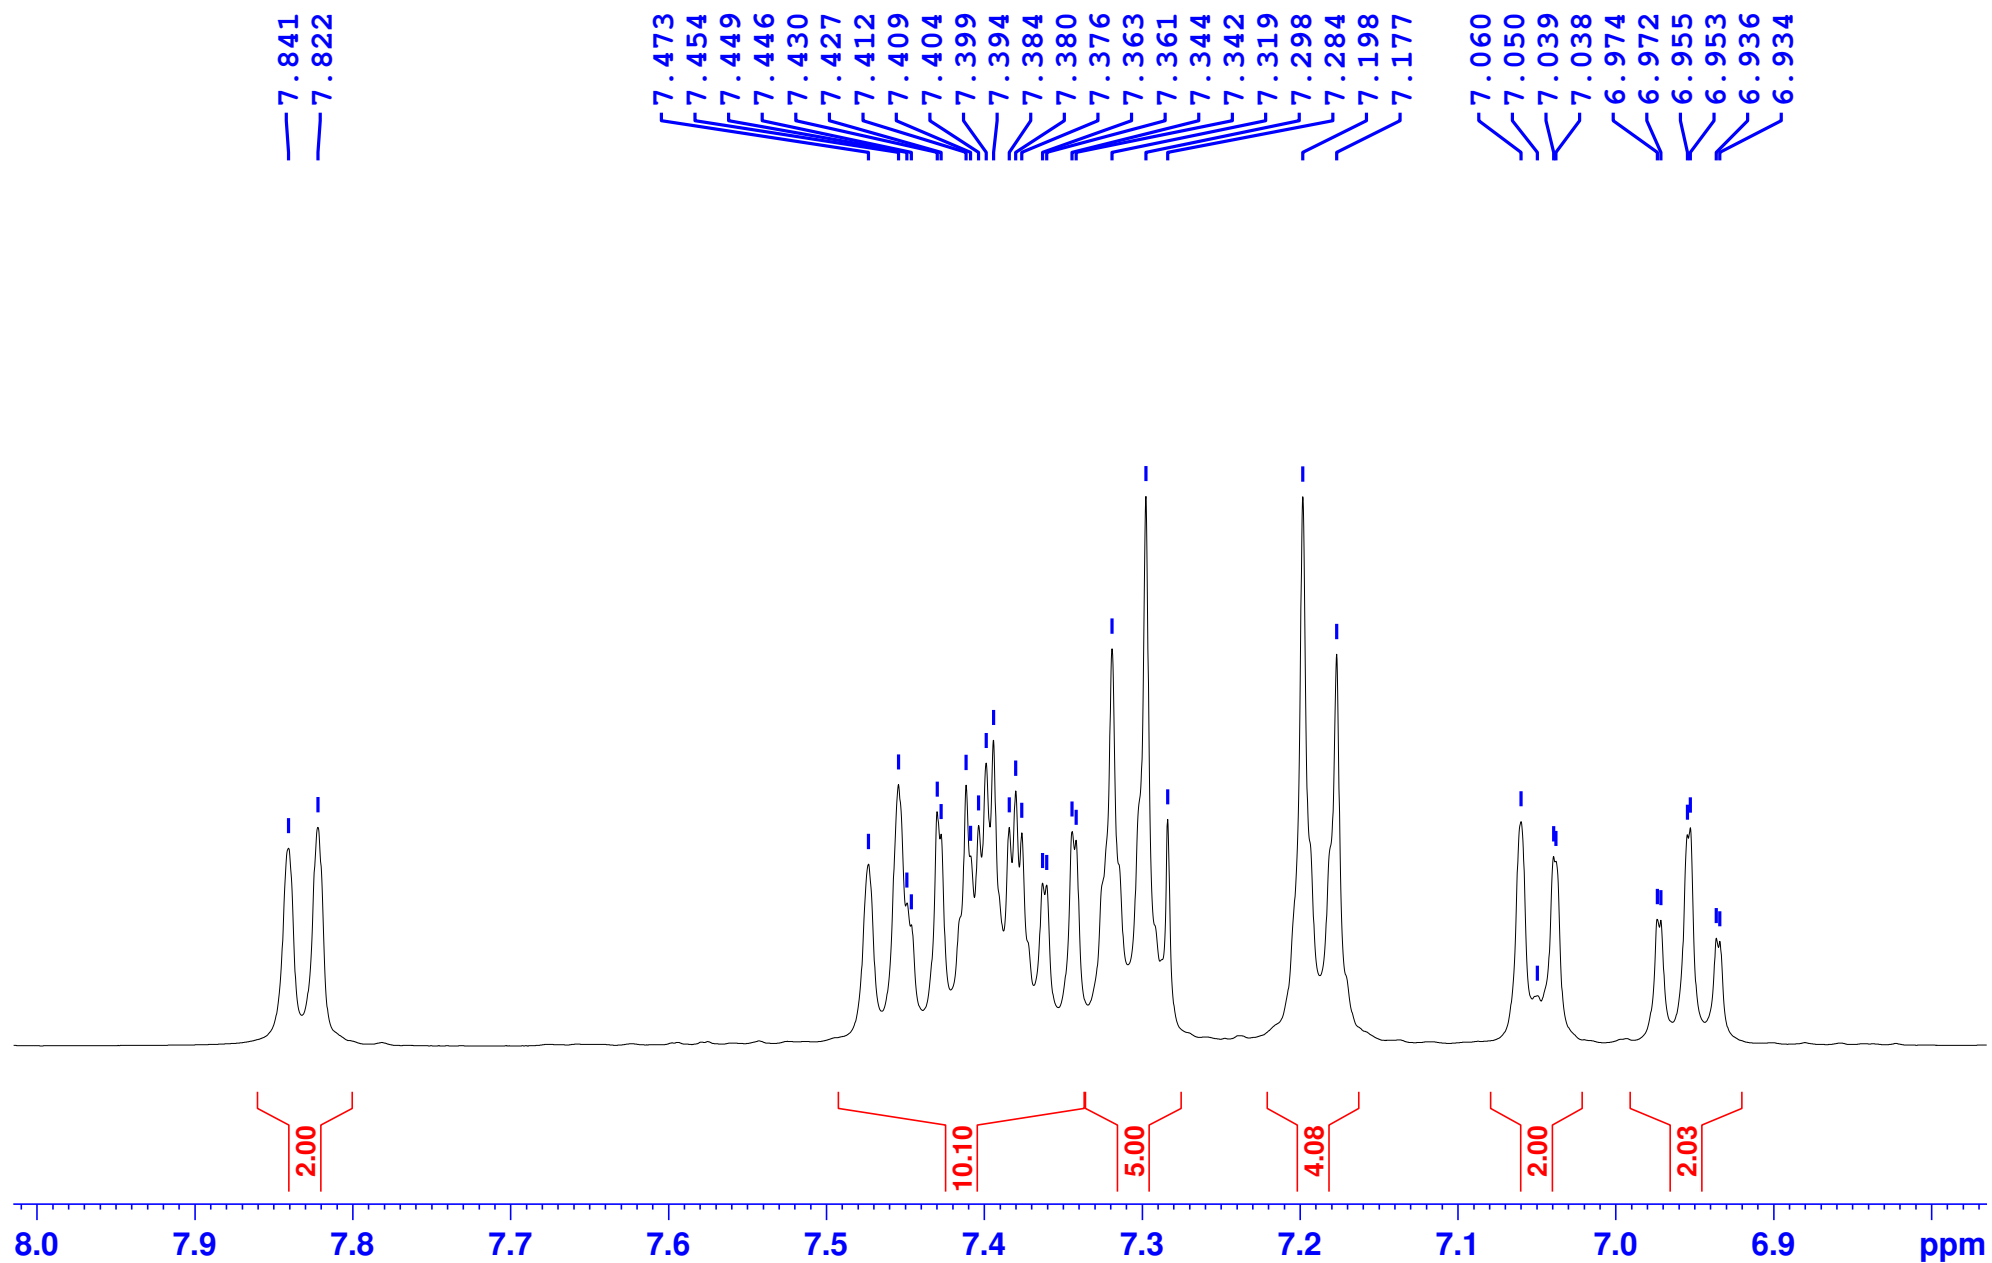

Compound 2 (13C NMR, 400 MHz, CDCl3)



Current Data Parameters  
 NAME Shumaila Majeed  
 EXPNO  
 PROCNO

F2 - Acquisition Parameters  
 Date\_ 20190719  
 Time 15.53 h  
 INSTRUM spect  
 PROBHD Z116098\_0621  
 PULPROG zgpg30  
 TD 65536  
 SOLVENT CDCl3  
 NS 400  
 DS 4  
 SWH 24038.461 Hz  
 FIDRES 0.733596 Hz  
 AQ 1.3631488 sec  
 RG 199.48  
 DW 20.800 usec  
 DE 6.50 usec  
 TE 298.0 K  
 D1 2.00000000 sec  
 D11 0.03000000 sec  
 TD0 1  
 SFO1 100.6228298 MHz  
 NUC1 13C  
 P1 10.00 usec  
 PLW1 72.56700134 W  
 SFO2 400.1316005 MHz  
 NUC2 1H  
 CPDPRG[2] waltz16  
 PCPD2 90.00 usec  
 PLW2 16.68099976 W  
 PLW12 0.20593999 W  
 PLW13 0.10342000 W

F2 - Processing parameters  
 SI 32768  
 SF 100.6127685 MHz  
 WDW EM  
 SSB 0  
 LB 1.00 Hz  
 GB 0  
 PC 1.40

162.453  
 161.142  
 150.824  
 147.135  
 144.612  
 140.142  
 133.172  
 132.275  
 129.153  
 127.973  
 127.809  
 126.047  
 121.124  
 120.412  
 119.215  
 119.085  
 117.263  
 77.366  
 77.049  
 76.731  
 64.910

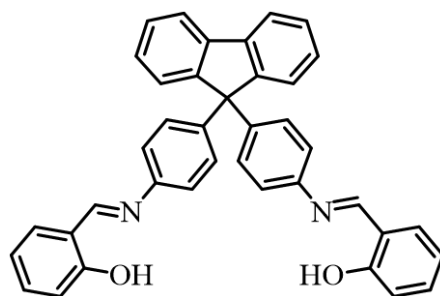

Compound 2

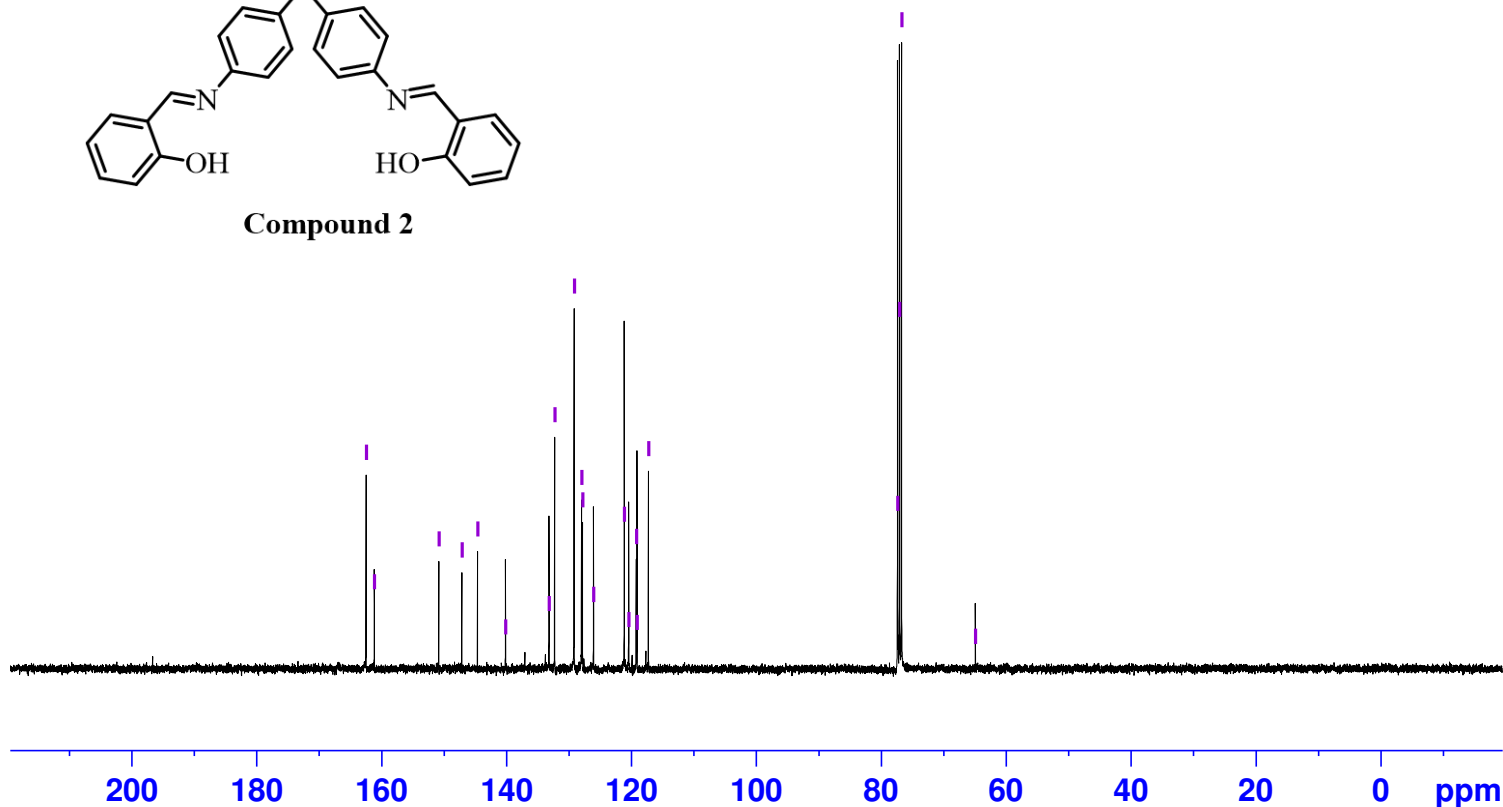

Compound 2 (<sup>13</sup>C NMR, 400 MHz, CDCl<sub>3</sub>)

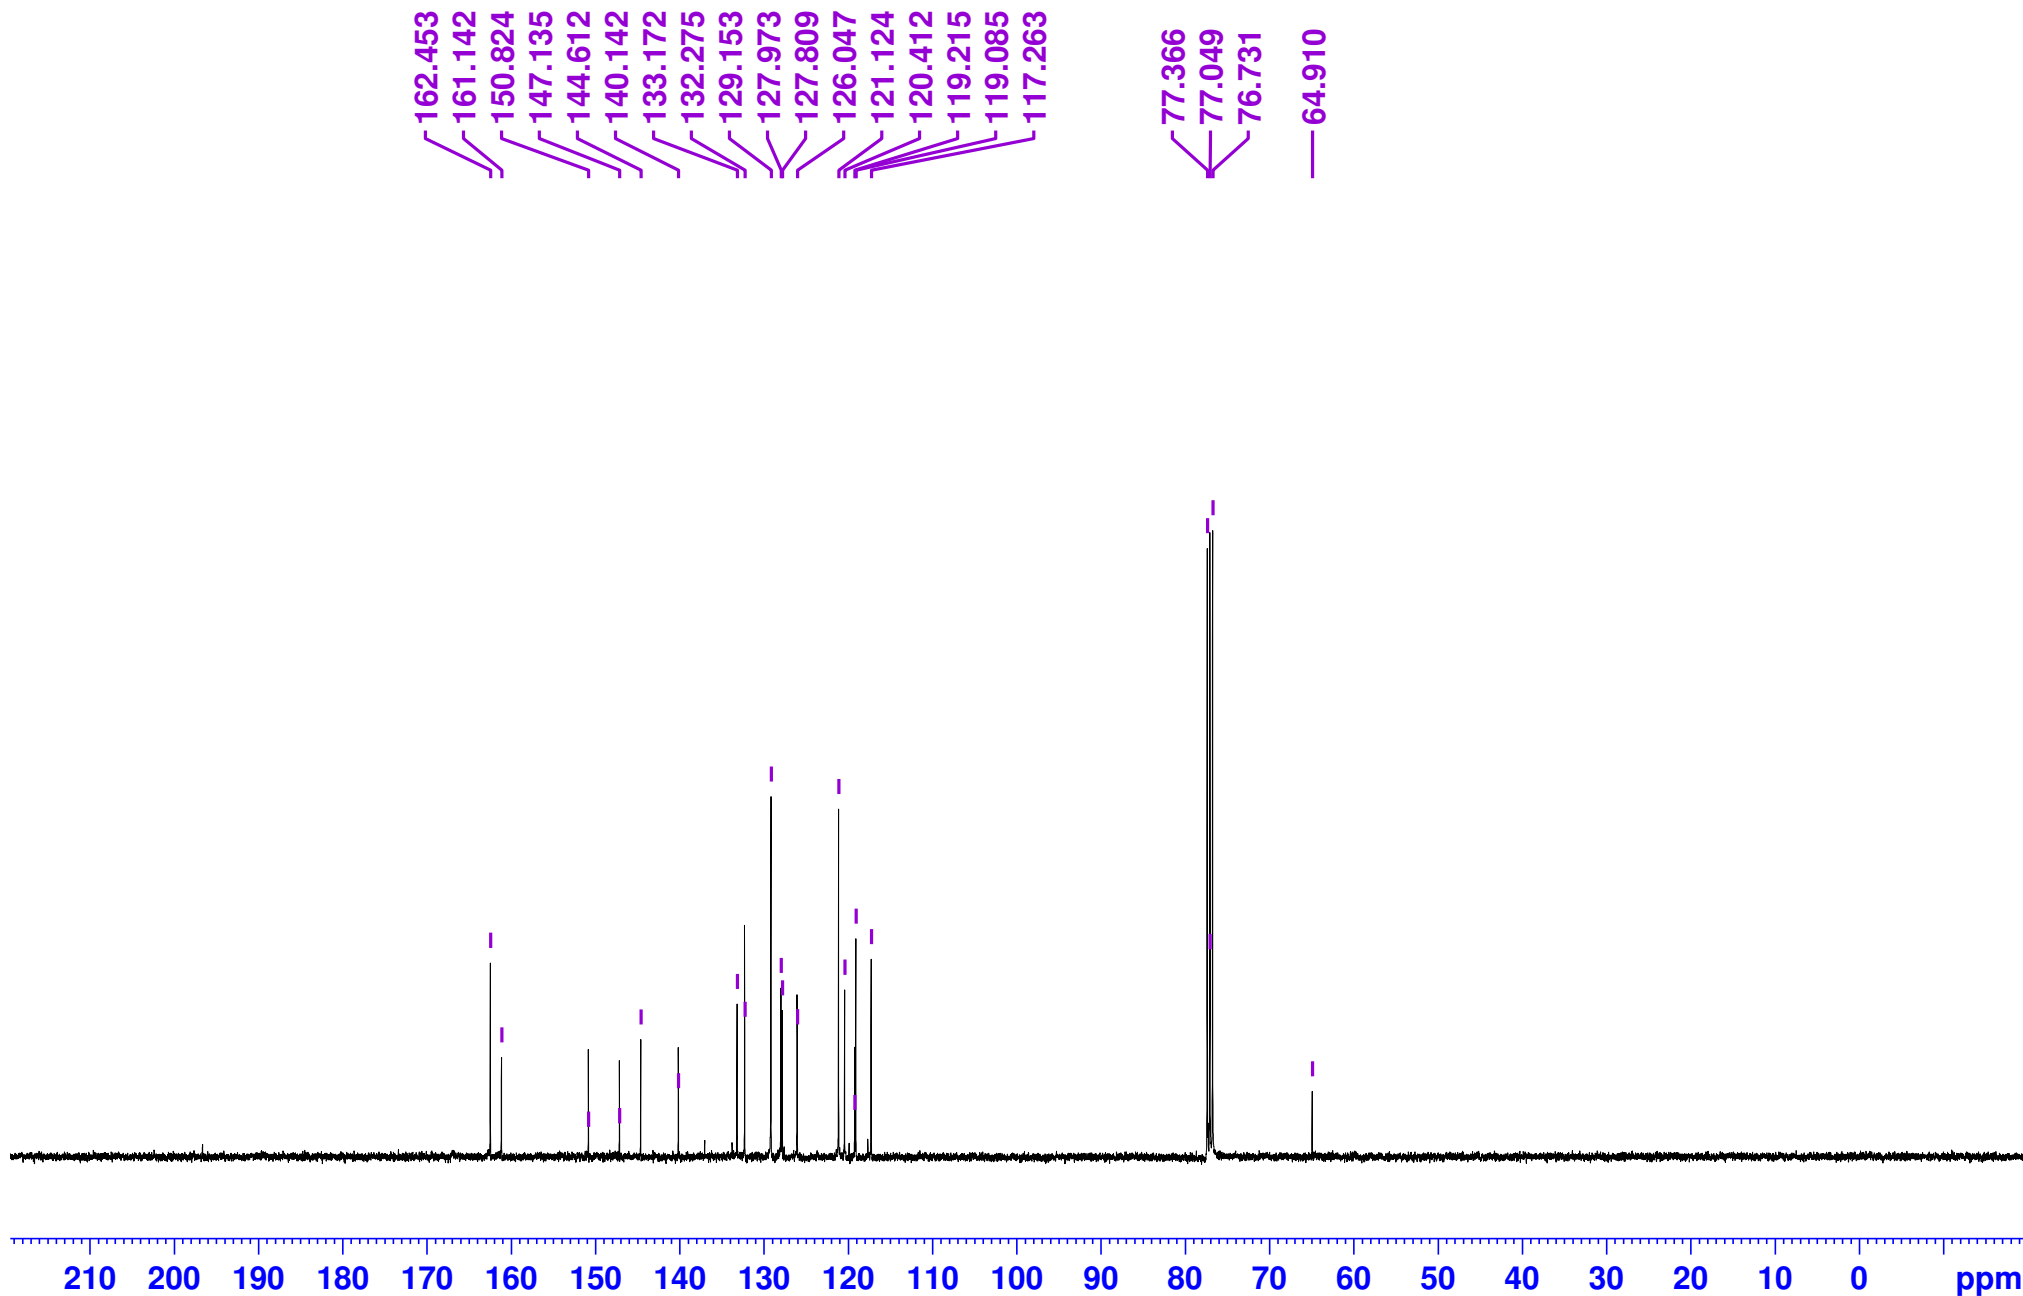

Compound 2 (<sup>13</sup>C NMR, 400 MHz, CDCl<sub>3</sub>)

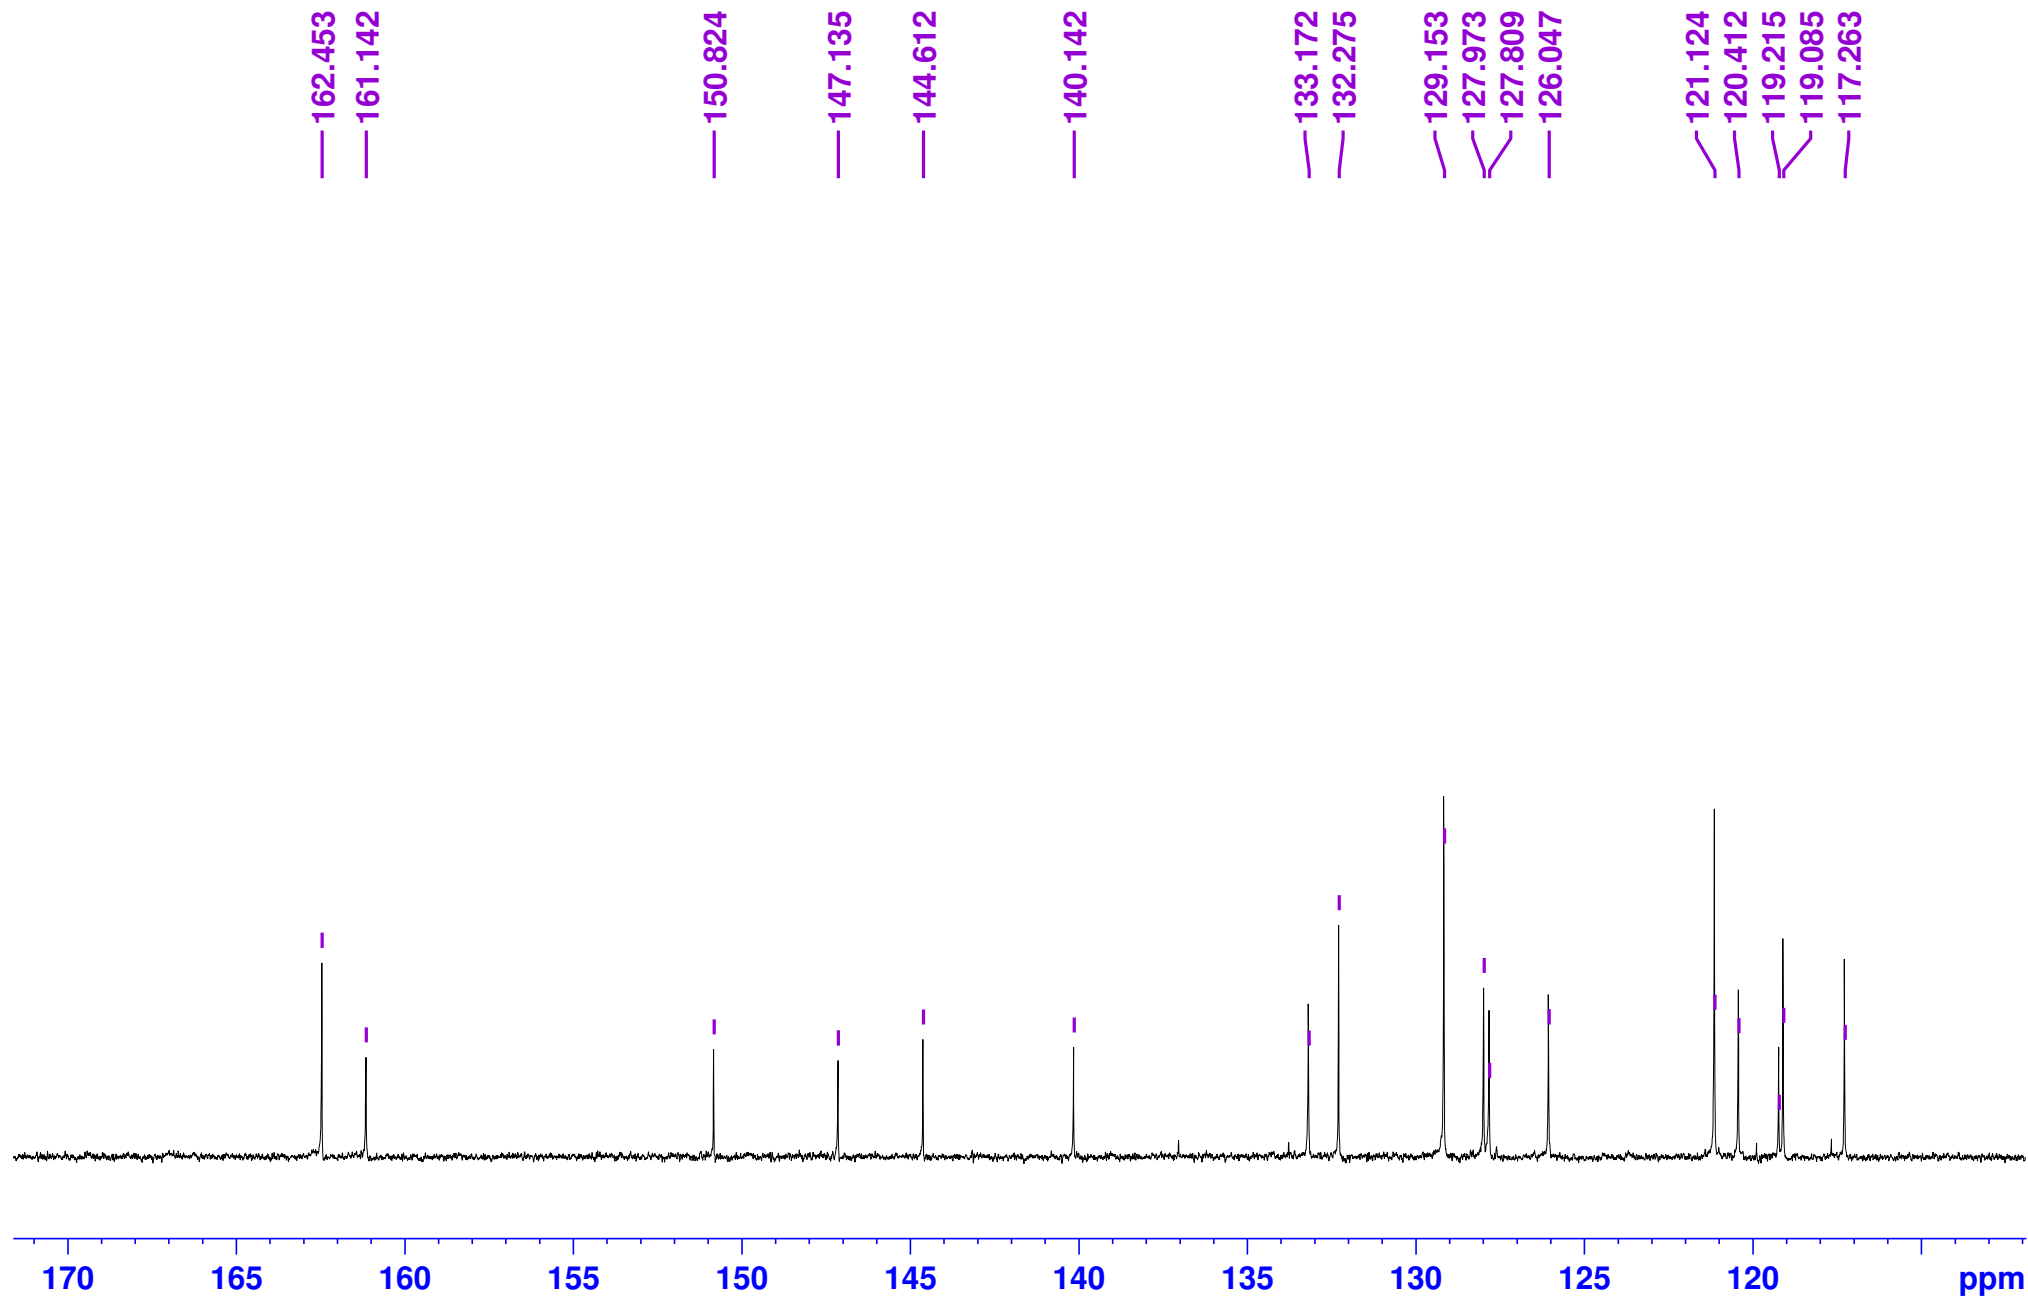

Compound 2 (<sup>13</sup>C NMR, 400 MHz, CDCl<sub>3</sub>)

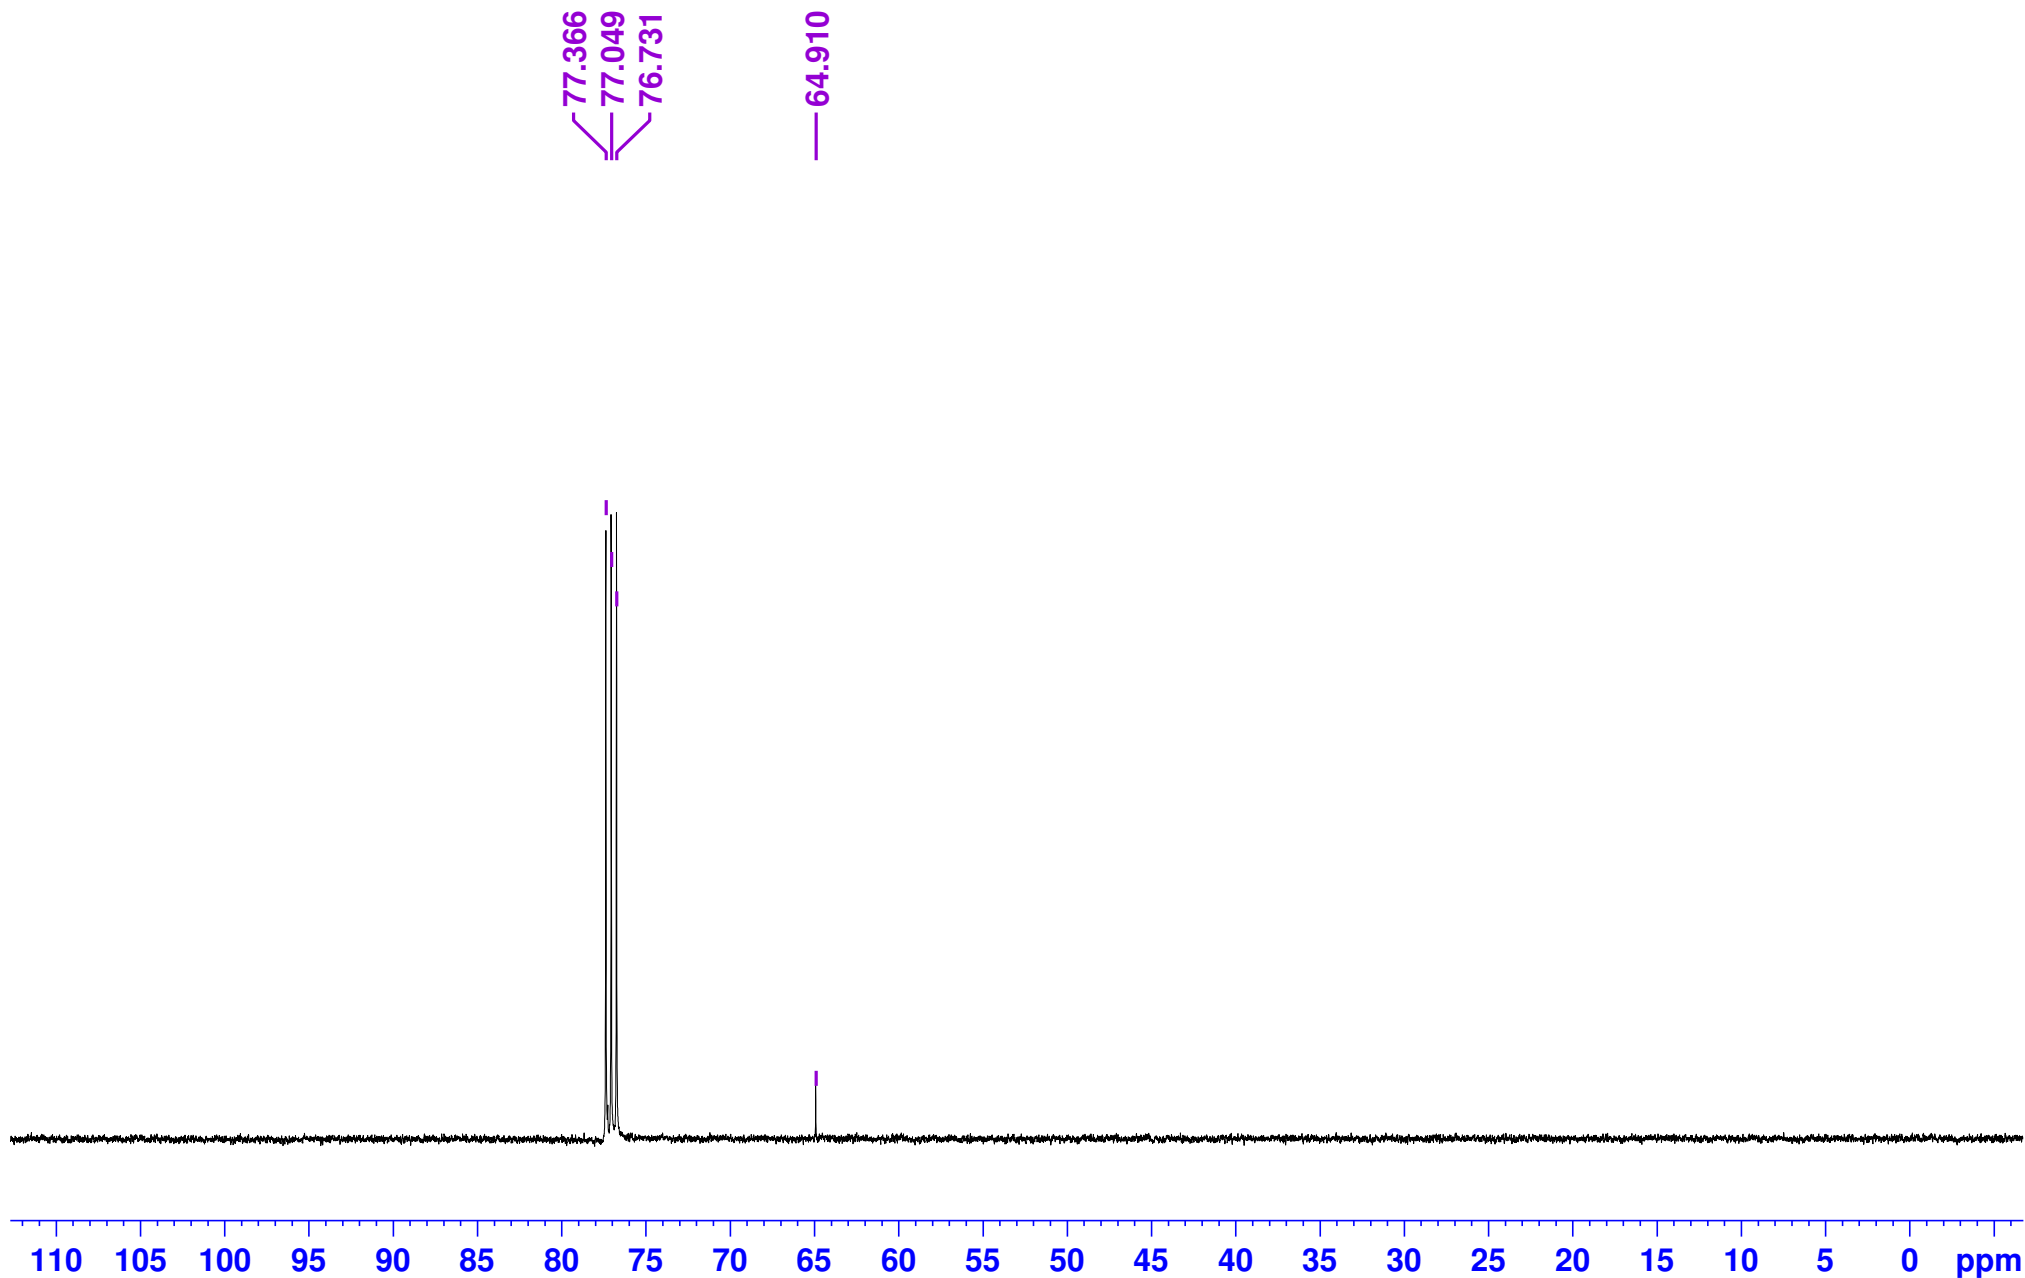

# Compound 2 (Mass spectrum)

SMSB\_220513095820 #1 RT: 0.00 AV: 1 NL: 2.22E5  
T: ITMS + p ESI Full ms [50.00-1500.00]

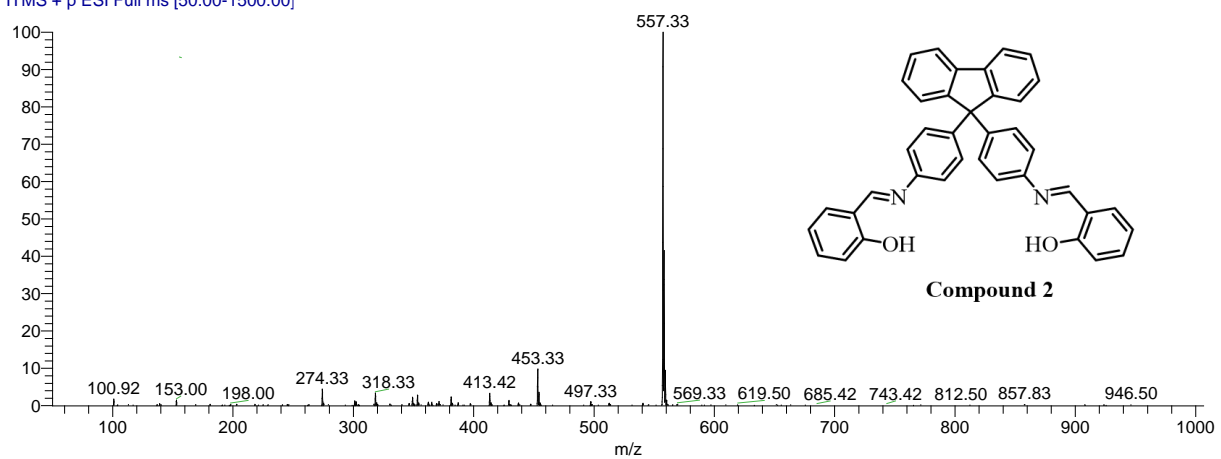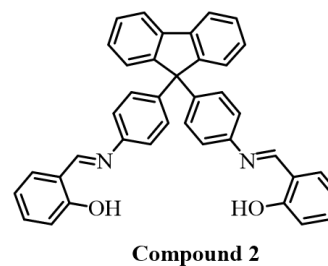

Supplement: d2an00937d2.pdf [file d2an00937d2.pdf]
